# Supplementary material for: Ulcerative Colitis Seems to Imply Oral Microbiome Dysbiosis
Source: MDPI journal article supplement (doi:10.3390/cimb44040103), 2022-03-30
Supplement: s1 [file s1]

## Supplementary materials

**Table S1.** Clinical information (mean  $\pm$  SD or range) of the participants in this study.

|                                                        | Healthy Subjects   | Ulcerative Colitis Subjects |
|--------------------------------------------------------|--------------------|-----------------------------|
| <b>n (total)</b>                                       | 11                 | 10                          |
| <b>n (females)</b>                                     | 6                  | 5                           |
| <b>n (males)</b>                                       | 5                  | 5                           |
| <b>Age (years)</b>                                     | 20 - 44            | 18 - 42                     |
| <b>BMI (18.5-24.9 Kg/ m<sup>2</sup>)</b>               | 23.66 $\pm$ 4.17   | 26.94 $\pm$ 4.70            |
| <b>Glucose (70-110mg/gL)</b>                           | 77.63 $\pm$ 5.86   | 109.00 $\pm$ 52.05          |
| <b>Cholesterol (&lt;200 mg/gL)</b>                     | 180.90 $\pm$ 23.92 | 202.50 $\pm$ 19.82          |
| <b>Triglycerides (&lt;150 mg/gL)</b>                   | 76.54 $\pm$ 21.40  | 118.75 $\pm$ 56.75          |
| <b>HDL (&gt;40 mg/gL)</b>                              | 61.54 $\pm$ 12.63  | 52.50 $\pm$ 3.50            |
| <b>LDL (&lt;130 mg/gL)</b>                             | 104.18 $\pm$ 24.34 | 127.00 $\pm$ 33.00          |
| <b>Fecal calprotectin (&lt;50 <math>\mu</math>g/g)</b> | -                  | 1827.94 $\pm$ 2159.58       |
| <b>Partial Mayo score</b>                              | -                  | 4.22 $\pm$ 1.61             |

BMI, Body Mass Index; HDL, High Density Lipoprotein; LDL, Low Density Lipoprotein. Partial Mayo score is calculated from “Stool frequency”, “Rectal Bleeding” and Physician’s global assessment”. The range values considered normal for each value are shown in brackets.

**Table S2.** Comparison of the oral taxonomic profiles between UC participants of the study and a group of healthy donors.

| Taxonomy           | Mean $\pm$ SD Healthy | Mean $\pm$ SD UC  | <i>p-values</i> |
|--------------------|-----------------------|-------------------|-----------------|
|                    | Volunteers            | Patients          |                 |
| Phylum             |                       |                   |                 |
| Actinobacteria     | 4.77 $\pm$ 2.20       | 5.64 $\pm$ 3.57   | 0.704           |
| Bacteroidetes      | 33.88 $\pm$ 5.46      | 31.46 $\pm$ 10.18 | 0.704           |
| Bacteroidetes      | 33.88 $\pm$ 5.46      | 31.46 $\pm$ 10.18 | 0.704           |
| Epsilonbacteraeota | 0.69 $\pm$ 0.35       | 0.50 $\pm$ 0.33   | 0.426           |

|                                 |                    |                     |                          |
|---------------------------------|--------------------|---------------------|--------------------------|
| Firmicutes                      | 44.89 ± 6.88       | 41.9 ± 5.56         | 0.511                    |
| Fusobacteria                    | 5.29 ± 3.26        | 6.56 ± 3.68         | 0.468                    |
| Patescibacteria                 | 3.75 ± 2.55        | 2.30 ± 1.69         | 0.314                    |
| <b>Proteobacteria</b>           | <b>6.24 ± 4.35</b> | <b>11.49 ± 7.47</b> | <b>0.072<sup>#</sup></b> |
| <b>Spirochaetes</b>             | <b>0.39 ± 0.80</b> | <b>0.09 ± 0.12</b>  | <b>0.097<sup>#</sup></b> |
| Synergistetes                   | 0.04 ± 0.08        | 0.01 ± 0.03         | 0.294                    |
| Tenericutes                     | 0.05 ± 0.05        | 0.03 ± 0.05         | 0.287                    |
| <hr/>                           |                    |                     |                          |
| Family                          |                    |                     |                          |
| <i>Actinomycetaceae</i>         | 1.41 ± 0.71        | 1.30 ± 1.22         | 0.349                    |
| <i>Aerococcaceae</i>            | 0.05 ± 0.06        | 0.09 ± 0.15         | 0.802                    |
| <b><i>Atopobiaceae</i></b>      | <b>1.08 ± 0.56</b> | <b>0.67 ± 0.66</b>  | <b>0.084<sup>#</sup></b> |
| <i>Bacteroidaceae</i>           | 0.03 ± 0.11        | 0.00 ± 0.00         | 1                        |
| <i>Bifidobacteriaceae</i>       | 0.03 ± 0.07        | 0.02 ± 0.04         | 0.310                    |
| <i>Burkholderiaceae</i>         | 0.08 ± 0.08        | 0.14 ± 0.12         | 0.481                    |
| <i>Campylobacteraceae</i>       | 0.69 ± 0.35        | 0.50 ± 0.33         | 0.426                    |
| <i>Cardiobacteriaceae</i>       | 0.02 ± 0.02        | 0.05 ± 0.05         | 0.319                    |
| <i>Carnobacteriaceae</i>        | 1.27 ± 0.69        | 1.22 ± 0.55         | 0.972                    |
| <i>Corynebacteriaceae</i>       | 0.04 ± 0.03        | 0.33 ± 0.55         | 0.129                    |
| <b><i>Defluviitaleaceae</i></b> | <b>0.02 ± 0.03</b> | <b>0.00 ± 0.00</b>  | <b>0.014<sup>*</sup></b> |
| <i>Erysipelotrichaceae</i>      | 0.54 ± 0.23        | 0.50 ± 0.53         | 0.217                    |
| Family_XI                       | 1.06 ± 0.42        | 1.90 ± 1.30         | 0.132                    |
| <b>Family_XI</b>                | <b>0.35 ± 0.24</b> | <b>0.23 ± 0.50</b>  | <b>0.022<sup>*</sup></b> |
| <b>Family_XIII</b>              | <b>1.16 ± 0.89</b> | <b>0.35 ± 0.31</b>  | <b>0.024<sup>*</sup></b> |
| <i>Flavobacteriaceae</i>        | 0.68 ± 0.45        | 1.35 ± 1.31         | 0.511                    |
| <i>Fusobacteriaceae</i>         | 2.48 ± 1.47        | 2.96 ± 2.49         | 0.972                    |
| <b><i>Lachnospiraceae</i></b>   | <b>3.38 ± 1.45</b> | <b>2.00 ± 1.33</b>  | <b>0.061<sup>#</sup></b> |
| <i>Lactobacillaceae</i>         | 0.12 ± 0.33        | 0.37 ± 0.74         | 0.342                    |

|                                     |                    |                    |                          |
|-------------------------------------|--------------------|--------------------|--------------------------|
| <i>Lentimicrobiaceae</i>            | 0.02 ± 0.02        | 0.02 ± 0.05        | 0.172                    |
| <i>Leptotrichiaceae</i>             | 2.81 ± 2.18        | 3.60 ± 2.58        | 0.511                    |
| <i>Micrococcaceae</i>               | 2.20 ± 1.65        | 3.30 ± 2.14        | 0.251                    |
| <i>Moraxellaceae</i>                | 0.04 ± 0.10        | 0.01 ± 0.02        | 0.508                    |
| <i>Mycoplasmataceae</i>             | 0.02 ± 0.02        | 0.03 ± 0.05        | 0.732                    |
| <b><i>Neisseriaceae</i></b>         | <b>2.19 ± 1.58</b> | <b>6.29 ± 5.14</b> | <b>0.019*</b>            |
| <i>Paludibacteraceae</i>            | 0.07 ± 0.12        | 0.04 ± 0.06        | 0.643                    |
| <i>Pasteurellaceae</i>              | 3.90 ± 2.83        | 5.00 ± 2.94        | 0.349                    |
| <b><i>Peptococcaceae</i></b>        | <b>0.16 ± 0.15</b> | <b>0.08 ± 0.16</b> | <b>0.064<sup>#</sup></b> |
| <b><i>Peptostreptococcaceae</i></b> | <b>2.54 ± 4.02</b> | <b>0.38 ± 0.46</b> | <b>0.044*</b>            |
| <i>Porphyromonadaceae</i>           | 5.92 ± 5.15        | 2.93 ± 2.83        | 0.223                    |
| <i>Prevotellaceae</i>               | 26.75 ± 8.24       | 26.76 ± 10.43      | 1                        |
| <i>Propionibacteriaceae</i>         | 0.00 ± 0.00        | 0.02 ± 0.04        | 0.147                    |
| <b><i>Rikenellaceae</i></b>         | <b>0.05 ± 0.12</b> | <b>0.00 ± 0.00</b> | <b>0.057<sup>#</sup></b> |
| <b><i>Ruminococcaceae</i></b>       | <b>0.59 ± 0.42</b> | <b>0.24 ± 0.22</b> | <b>0.066<sup>#</sup></b> |
| <i>Saccharimonadaceae</i>           | 2.84 ± 1.98        | 2.02 ± 1.77        | 0.426                    |
| <b><i>Spirochaetaceae</i></b>       | <b>0.39 ± 0.80</b> | <b>0.09 ± 0.12</b> | <b>0.096<sup>#</sup></b> |
| <i>Streptococcaceae</i>             | 11.77 ± 4.98       | 12.29 ± 6.20       | 0.863                    |
| <i>Synergistaceae</i>               | 0.04 ± 0.08        | 0.01 ± 0.03        | 0.294                    |
| <i>Tannerellaceae</i>               | 0.16 ± 0.11        | 0.13 ± 0.10        | 0.698                    |
| <i>Veillonellaceae</i>              | 21.86 ± 7.26       | 22.24 ± 7.52       | 0.917                    |
| <i>Weeksellaceae</i>                | 0.16 ± 0.16        | 0.23 ± 0.15        | 0.173                    |
| <hr/>                               |                    |                    |                          |
| Genus                               |                    |                    |                          |
| <i>Abiotrophia</i>                  | 0.050 ± 0.055      | 0.090 ± 0.150      | 0.802                    |
| <i>Acholeplasma</i>                 | 0.006 ± 0.016      | 0.000 ± 0.000      | 0.189                    |
| <i>Actinobacillus</i>               | 0.007 ± 0.021      | 0.029 ± 0.052      | 0.281                    |
| <i>Actinomyces</i>                  | 1.397 ± 0.721      | 1.279 ± 1.202      | 0.387                    |

|                                         |                      |                      |                          |
|-----------------------------------------|----------------------|----------------------|--------------------------|
| <i>Aggregatibacter</i>                  | 0.085 ± 0.084        | 0.206 ± 0.294        | 0.971                    |
| <i>Alloprevotella</i>                   | 3.003 ± 1.527        | 3.148 ± 2.102        | 0.918                    |
| <i>Alloscardovia</i>                    | 0.001 ± 0.002        | 0.002 ± 0.007        | 0.729                    |
| <i>Alysiella</i>                        | 0.008 ± 0.014        | 0.006 ± 0.012        | 0.814                    |
| <i>Anaeroglobus</i>                     | 0.025 ± 0.029        | 0.014 ± 0.020        | 0.469                    |
| <b><i>Atopobium</i></b>                 | <b>1.068 ± 0.563</b> | <b>0.673 ± 0.656</b> | <b>0.084<sup>#</sup></b> |
| <i>Bacteroides</i>                      | 0.035 ± 0.109        | 0.000 ± 0.000        | 1                        |
| <i>Bergeriella</i>                      | 0.001 ± 0.002        | 0.000 ± 0.000        | 0.391                    |
| <i>Bergeyella</i>                       | 0.163 ± 0.159        | 0.225 ± 0.152        | 0.173                    |
| <i>Bifidobacterium</i>                  | 0.016 ± 0.027        | 0.006 ± 0.014        | 0.257                    |
| <b><i>Bulleidia</i></b>                 | <b>0.009 ± 0.017</b> | <b>0.000 ± 0.000</b> | <b>0.093<sup>#</sup></b> |
| <i>Butyrivibrio_2</i>                   | 0.137 ± 0.107        | 0.183 ± 0.320        | 0.454                    |
| <i>Campylobacter</i>                    | 0.686 ± 0.351        | 0.501 ± 0.327        | 0.426                    |
| <i>Candidatus_Saccharimonas</i>         | 0.321 ± 0.216        | 0.240 ± 0.236        | 0.503                    |
| <i>Capnocytophaga</i>                   | 0.681 ± 0.449        | 1.351 ± 1.311        | 0.511                    |
| <i>Cardiobacterium</i>                  | 0.020 ± 0.016        | 0.049 ± 0.053        | 0.318                    |
| <i>Catonella</i>                        | 0.208 ± 0.138        | 0.190 ± 0.153        | 0.860                    |
| <i>Citrobacter</i>                      | 0.001 ± 0.002        | 0.000 ± 0.000        | 0.391                    |
| <i>Comamonas</i>                        | 0.001 ± 0.004        | 0.000 ± 0.000        | 0.391                    |
| <i>Corynebacterium</i>                  | 0.040 ± 0.027        | 0.332 ± 0.547        | 0.128                    |
| <i>Cryptobacterium</i>                  | 0.001 ± 0.002        | 0.002 ± 0.005        | 0.729                    |
| <b><i>Defluviitaleaceae_UCG-011</i></b> | <b>0.022 ± 0.031</b> | <b>0.001 ± 0.004</b> | <b>0.014<sup>*</sup></b> |
| <i>Desulfohalobium</i>                  | 0.001 ± 0.002        | 0.000 ± 0.000        | 0.391                    |
| <i>Dialister</i>                        | 0.122 ± 0.128        | 0.108 ± 0.110        | 0.503                    |
| <i>Eggerthia</i>                        | 0.004 ± 0.012        | 0.000 ± 0.000        | 0.391                    |
| <i>Eikenella</i>                        | 0.020 ± 0.023        | 0.032 ± 0.034        | 0.424                    |
| <i>Erysipelotrichaceae_UCG-006</i>      | 0.001 ± 0.003        | 0.001 ± 0.003        | 0.945                    |

|                                     |                      |                      |                           |
|-------------------------------------|----------------------|----------------------|---------------------------|
| <i>Ezakiella</i>                    | <b>0.007 ± 0.014</b> | <b>0.000 ± 0.000</b> | <b>0.093<sup>#</sup></b>  |
| Family_XIII_UCG-001                 | 0.032 ± 0.039        | 0.008 ± 0.014        | 0.138                     |
| <i>Filifactor</i>                   | <b>0.218 ± 0.428</b> | <b>0.014 ± 0.033</b> | <b>0.014<sup>**</sup></b> |
| <i>Fretibacterium</i>               | 0.034 ± 0.071        | 0.015 ± 0.030        | 0.294                     |
| <i>Fusobacterium</i>                | 2.475 ± 1.472        | 2.962 ± 2.493        | 0.972                     |
| <i>Gemella</i>                      | 1.061 ± 0.424        | 1.903 ± 1.302        | 0.132                     |
| <i>Granulicatella</i>               | 1.266 ± 0.689        | 1.218 ± 0.554        | 0.972                     |
| <i>Haemophilus</i>                  | 3.728 ± 2.775        | 4.658 ± 2.739        | 0.386                     |
| <i>Howardella</i>                   | 0.001 ± 0.004        | 0.001 ± 0.002        | 1                         |
| <i>Johnsonella</i>                  | 0.138 ± 0.175        | 0.059 ± 0.093        | 0.441                     |
| <i>Kingella</i>                     | 0.050 ± 0.042        | 0.488 ± 1.184        | 0.417                     |
| <i>Lachnoanaerobaculum</i>          | <b>0.947 ± 0.599</b> | <b>0.333 ± 0.187</b> | <b>0.018<sup>*</sup></b>  |
| <i>Lachnospiraceae_NK3A20_group</i> | 0.002 ± 0.006        | 0.000 ± 0.000        | 0.391                     |
| <i>Lactobacillus</i>                | 0.118 ± 0.325        | 0.373 ± 0.739        | 0.342                     |
| <i>Lautropia</i>                    | 0.071 ± 0.080        | 0.106 ± 0.118        | 0.831                     |
| <i>Leptotrichia</i>                 | 2.784 ± 2.154        | 3.595 ± 2.582        | 0.511                     |
| <i>Megasphaera</i>                  | 1.653 ± 1.565        | 1.065 ± 1.022        | 0.573                     |
| <i>Mobiluncus</i>                   | 0.015 ± 0.023        | 0.008 ± 0.016        | 0.402                     |
| <i>Mogibacterium</i>                | 0.010 ± 0.014        | 0.002 ± 0.005        | 0.136                     |
| <i>Moraxella</i>                    | 0.037 ± 0.103        | 0.007 ± 0.019        | 0.741                     |
| <i>Moryella</i>                     | 0.007 ± 0.023        | 0.000 ± 0.000        | 0.391                     |
| <i>Mycoplasma</i>                   | 0.018 ± 0.022        | 0.026 ± 0.047        | 0.732                     |
| <i>Neisseria</i>                    | <b>2.013 ± 1.544</b> | <b>5.664 ± 5.148</b> | <b>0.034<sup>*</sup></b>  |
| <i>Olsenella</i>                    | 0.012 ± 0.039        | 0.000 ± 0.000        | 0.391                     |
| <i>Oribacterium</i>                 | 1.250 ± 0.731        | 0.961 ± 0.685        | 0.511                     |
| <i>Parascardovia</i>                | 0.002 ± 0.005        | 0.000 ± 0.000        | 0.391                     |
| <i>Parvimonas</i>                   | <b>0.338 ± 0.238</b> | <b>0.233 ± 0.498</b> | <b>0.022<sup>*</sup></b>  |

|                                           |                      |                      |                          |
|-------------------------------------------|----------------------|----------------------|--------------------------|
| <i>Peptoanaerobacter</i>                  | 0.003 ± 0.008        | 0.004 ± 0.006        | 0.895                    |
| <b><i>Peptococcus</i></b>                 | <b>0.162 ± 0.149</b> | <b>0.075 ± 0.165</b> | <b>0.064<sup>#</sup></b> |
| <i>Peptoniphilus</i>                      | 0.001 ± 0.002        | 0.000 ± 0.000        | 0.391                    |
| <b><i>Peptostreptococcus</i></b>          | <b>2.189 ± 3.849</b> | <b>0.341 ± 0.434</b> | <b>0.084<sup>#</sup></b> |
| <i>Phocaeicola</i>                        | 0.015 ± 0.045        | 0.000 ± 0.000        | 0.189                    |
| <i>Porphyromonas</i>                      | 5.921 ± 5.146        | 2.927 ± 2.826        | 0.223                    |
| <i>Prevotella</i>                         | 4.179 ± 2.386        | 3.475 ± 2.266        | 0.756                    |
| <i>Prevotella_2</i>                       | 0.240 ± 0.326        | 0.364 ± 0.360        | 0.672                    |
| <i>Prevotella_6</i>                       | 1.196 ± 0.746        | 0.934 ± 0.862        | 0.314                    |
| <i>Prevotella_7</i>                       | 18.104 ± 8.544       | 18.83 ± 9.337        | 0.917                    |
| <i>Pseudomonas</i>                        | 0.000 ± 0.000        | 0.002 ± 0.003        | 0.147                    |
| <i>Pseudopropionibacterium</i>            | 0.000 ± 0.000        | 0.017 ± 0.043        | 0.147                    |
| <i>Pseudoramibacter</i>                   | 0.005 ± 0.012        | 0.000 ± 0.000        | 0.189                    |
| <i>Pyramidobacter</i>                     | 0.009 ± 0.029        | 0.000 ± 0.000        | 0.391                    |
| <i>Ralstonia</i>                          | 0.008 ± 0.008        | 0.032 ± 0.063        | 0.633                    |
| <b><i>Rikenellaceae_RC9_gut_group</i></b> | <b>0.047 ± 0.121</b> | <b>0.001 ± 0.002</b> | <b>0.057<sup>#</sup></b> |
| <i>Rothia</i>                             | 2.203 ± 1.655        | 3.296 ± 2.135        | 0.251                    |
| <b><i>Ruminococcaceae_UCG-014</i></b>     | <b>0.585 ± 0.423</b> | <b>0.239 ± 0.220</b> | <b>0.066<sup>#</sup></b> |
| <i>Scardovia</i>                          | 0.015 ± 0.042        | 0.009 ± 0.021        | 0.801                    |
| <i>Selenomonas</i>                        | 0.193 ± 0.176        | 0.150 ± 0.152        | 0.479                    |
| <i>Selenomonas_3</i>                      | 0.877 ± 0.844        | 0.674 ± 0.714        | 0.459                    |
| <i>Selenomonas_4</i>                      | 0.028 ± 0.043        | 0.016 ± 0.020        | 0.797                    |
| <i>Shuttleworthia</i>                     | 0.017 ± 0.025        | 0.008 ± 0.014        | 0.279                    |
| <i>Simonsiella</i>                        | 0.003 ± 0.01         | 0.012 ± 0.027        | 0.524                    |
| <i>Solobacterium</i>                      | 0.523 ± 0.241        | 0.500 ± 0.532        | 0.245                    |
| <i>Sphaerochaeta</i>                      | 0.005 ± 0.016        | 0.000 ± 0.000        | 0.391                    |
| <b><i>Staphylococcus</i></b>              | <b>0.000 ± 0.000</b> | <b>0.005 ± 0.005</b> | <b>0.011<sup>*</sup></b> |

|                        |                |                |                    |
|------------------------|----------------|----------------|--------------------|
| <i>Stomatobaculum</i>  | 0.592 ± 0.374  | 0.242 ± 0.177  | 0.035*             |
| <i>Streptobacillus</i> | 0.008 ± 0.014  | 0.002 ± 0.006  | 0.281              |
| <i>Streptococcus</i>   | 11.77 ± 4.984  | 12.291 ± 6.196 | 0.863              |
| <i>Tannerella</i>      | 0.160 ± 0.115  | 0.132 ± 0.098  | 0.698              |
| <i>Treponema_2</i>     | 0.389 ± 0.781  | 0.094 ± 0.116  | 0.096 <sup>#</sup> |
| <i>Veillonella</i>     | 18.892 ± 7.413 | 20.180 ± 7.801 | 0.704              |

**Table S3.** Sequence of the differential ASVs detected between UC patients and healthy volunteers. Absolute number of reads detected per sample (number codes) in each group is also shown.

|                         |                                   | Total number of reads detected per sample<br>(codes) in UC group |         |         |         |         |         |         |         |         |         | Total number of reads detected per sample<br>(codes) in Control group |   |   |   |   |   |   |   |   |   |
|-------------------------|-----------------------------------|------------------------------------------------------------------|---------|---------|---------|---------|---------|---------|---------|---------|---------|-----------------------------------------------------------------------|---|---|---|---|---|---|---|---|---|
| ASV<br>Code<br>Assigned | Sequence                          | 11<br>6                                                          | 11<br>8 | 12<br>0 | 12<br>2 | 12<br>4 | 12<br>6 | 12<br>8 | 13<br>0 | 13<br>2 | 13<br>4 |                                                                       |   |   |   |   |   |   |   |   |   |
| ASV4                    | GCAGCAGTGGGGAATCTTCCGCAATGGACGA   |                                                                  |         |         |         |         |         |         |         |         |         |                                                                       |   |   |   |   |   |   |   |   |   |
|                         | AAGTCTGACGGAGCAACGCCGCGTGAGTGAT   |                                                                  |         |         |         |         |         |         |         |         |         |                                                                       |   |   |   |   |   |   |   |   |   |
|                         | GACGGCCTTCGGGTTGTAAAGCTCTGTTAATC  |                                                                  |         |         |         |         |         |         |         |         |         |                                                                       |   |   |   |   |   |   |   |   |   |
|                         | GGGACGAAAGGCCTTCTTGCGAATAGTGAGA   |                                                                  |         |         |         |         |         |         |         |         |         |                                                                       |   |   |   |   |   |   |   |   |   |
|                         | AGGATTGACGGTACCGGAATAGAAAGCCACG   |                                                                  |         |         |         |         |         |         |         |         |         |                                                                       |   |   |   |   |   |   |   |   |   |
|                         | GCTAACTACGTGCCAGCAGCCGCGGTAATACG  |                                                                  |         |         |         |         |         |         |         |         |         |                                                                       |   |   |   |   |   |   |   |   |   |
|                         | TAGGTGGCAAGCGTTGTCCGGAATTATTGGGC  | 0                                                                | 16      | 85      | 46      | 65      | 0       | 0       | 0       | 0       | 64      | 0                                                                     | 0 | 0 | 0 | 0 | 0 | 0 | 0 | 0 | 0 |
|                         | GTAAAGCGCGCGCAGGCGGATCAGTCAGTCT   |                                                                  |         |         |         |         |         |         |         |         |         |                                                                       |   |   |   |   |   |   |   |   |   |
|                         | GTCTTAAAAGTTTCGGGGCTTAACCCCGTGATG |                                                                  |         |         |         |         |         |         |         |         |         |                                                                       |   |   |   |   |   |   |   |   |   |
|                         | GGATGGAAACTGCTGATCTAGAGTATCGGAGA  |                                                                  |         |         |         |         |         |         |         |         |         |                                                                       |   |   |   |   |   |   |   |   |   |
|                         | GGAAAGTGGAATTCCTAGTGTAGCGGTGAAAT  |                                                                  |         |         |         |         |         |         |         |         |         |                                                                       |   |   |   |   |   |   |   |   |   |
|                         | GCGTAGATATTAGGAAGAACACCAGTGGCGA   |                                                                  |         |         |         |         |         |         |         |         |         |                                                                       |   |   |   |   |   |   |   |   |   |

|       |  |                                                                                                                                                                                                                                                     |   |    |    |    |    |    |   |   |   |   |   |   |   |   |   |   |   |   |   |
|-------|--|-----------------------------------------------------------------------------------------------------------------------------------------------------------------------------------------------------------------------------------------------------|---|----|----|----|----|----|---|---|---|---|---|---|---|---|---|---|---|---|---|
|       |  | AGGCGACTTTCTGGACGAAAAGTACGCTGAG<br>GCGCGAAAGCCAGGGGAGCGAACGGGATTAG<br>ATAC                                                                                                                                                                          |   |    |    |    |    |    |   |   |   |   |   |   |   |   |   |   |   |   |   |
|       |  | GCAGCAGTGGGGAATCTTCCGCAATGGACGA<br>AAGTCTGACGGAGCAACGCCGCGTGAGTGAT<br>GACGGCCTTCGGGTGTAAAGCTCTGTTAATC<br>GGGACGAAAGGCCTTCTTGCGAACAGTTAGA<br>AGGATTGACGGTACCGGAATAGAAAGCCACG<br>GCTAACTACGTGCCAGCAGCCGCGGTAATACG<br>TAGGTGGCAAGCGTTGTCCGGAATTATTGGGC |   |    |    |    |    |    |   |   |   |   |   |   |   |   |   |   |   |   |   |
| ASV14 |  | GTAAAGCGCGCGCAGGCGGATCAGTTAGTCTG                                                                                                                                                                                                                    | 0 | 49 | 89 | 10 | 0  | 20 | 0 | 0 | 0 | 0 | 0 | 0 | 0 | 0 | 0 | 0 | 0 | 0 | 0 |
|       |  | TCTTAAAAGTTCGGGGCTTAACCCCGTGATGG                                                                                                                                                                                                                    |   | 5  |    | 6  |    |    |   |   |   |   |   |   |   |   |   |   |   |   |   |
|       |  | GATGGAAACTGCTGATCTAGAGTATCGGAGAG<br>GAAAGTGGAATTCCTAGTGTAGCGGTGAAATG<br>CGTAGATATTAGGAAGAACACCAGTGGCGAA<br>GGCGACTTTCTGGACGAAAAGTACGCTGAGG<br>CGCGAAAGCCAGGGGAGCGAACGGGATTAGA<br>TAC                                                                |   |    |    |    |    |    |   |   |   |   |   |   |   |   |   |   |   |   |   |
|       |  | GCAGCAGTGGGGAATATTGGACAATGGACCA<br>AGAGTCTGATCCAGCAATTCTGTGTGCACGAT<br>GAAGTTTTTCGGAATGTAAAGTGCTTTCAGTTG<br>GGAAGAAAAAATGACGGTACCAACAGAAG                                                                                                           |   |    |    |    |    |    |   |   |   |   |   |   |   |   |   |   |   |   |   |
| ASV39 |  | AAGTGACGGCTAAATACGTGCCAGCAGCCGC                                                                                                                                                                                                                     | 0 | 38 | 0  | 11 | 19 | 4  | 0 | 0 | 0 | 0 | 0 | 0 | 0 | 0 | 0 | 0 | 0 | 0 | 0 |
|       |  | GGTAATACGTATGTCACAAGCGTTATCCGGAT                                                                                                                                                                                                                    |   |    |    | 6  | 9  |    |   |   |   |   |   |   |   |   |   |   |   |   |   |
|       |  | TTATTGGGCGTAAAGCGCTCTAGGTGGTTAT<br>GTAAGTCTGATGTGAAAATGCAGGGCTCAACT<br>CTGTATTGCGTTGGAAACTGTGTAAGTAGAGT                                                                                                                                             |   |    |    |    |    |    |   |   |   |   |   |   |   |   |   |   |   |   |   |



[illegible]

|                                                                                                                                                                                                                                                               |                                  |  |  |  |  |  |  |  |  |  |  |   |    |   |   |   |   |    |   |    |   |    |   |    |    |    |    |    |    |    |    |    |    |
|---------------------------------------------------------------------------------------------------------------------------------------------------------------------------------------------------------------------------------------------------------------|----------------------------------|--|--|--|--|--|--|--|--|--|--|---|----|---|---|---|---|----|---|----|---|----|---|----|----|----|----|----|----|----|----|----|----|
| TGTGAAAGCCCCGGGCTTAACCTGGGAATTGC<br>ATTTCATACTGGGTCGCTAGAGTACTTTAGGG<br>AGGGGTAGAATTCCACGTGTAGCGGTGAAATG<br>CGTAGAGATGTGGAGGAATACCGAAGGCGAA<br>GGCAGCCCCCTTGGGAATGTACTGACGCTCATG<br>TGCGAAAGCGTGGGGAGCAAACAGGATTAGA<br>TAC                                    |                                  |  |  |  |  |  |  |  |  |  |  |   |    |   |   |   |   |    |   |    |   |    |   |    |    |    |    |    |    |    |    |    |    |
| GCTGCAGTGAGGAATCTTCCACAATGGGCGAA<br>AGCCTGATGGAGCAACGCCGCGTGAAGGATG<br>AAGGCCTTCGGGTTGTAAACTTCTTTTATGAGT<br>GAAGAATATGACGGTAACTCATGAATAAGCA<br>CCGGCTAACTACGTGCCAGCAGCCGCGGTCAT<br>ACGTAGGGTGCAAGCATTATCCGGAGTGACTG<br>ASV75 GGCGTAAAGAGTTGCGTAGGCGGTTTAATAAG |                                  |  |  |  |  |  |  |  |  |  |  | 0 | 0  | 0 | 0 | 0 | 0 | 0  | 0 | 0  | 0 | 0  | 0 | 29 | 10 | 12 | 26 | 68 | 50 | 90 | 13 | 10 | 96 |
| 6                                                                                                                                                                                                                                                             | TGAATAGTGAAACCTGGTGGCTCAACCATACA |  |  |  |  |  |  |  |  |  |  | 9 | 2  | 1 | 9 | 9 | 6 |    | 6 | 81 | 4 |    |   |    |    |    |    |    |    |    |    |    |    |
| GACTATTATTCAAACGTGTTAAACTCGAGAATG<br>GTAGAGGTAACGTGAATTTCTAGTGTAGGAGT<br>GAAATCCGTAGATATTAGAAGGAACACCGAT<br>GGCGTAGGCAGGTTACTGGGCCATTTCTGACG<br>CTAAGGCACGAAAGCGTGGGGAGCGAACCGG<br>ATTAGATAC                                                                  |                                  |  |  |  |  |  |  |  |  |  |  |   |    |   |   |   |   |    |   |    |   |    |   |    |    |    |    |    |    |    |    |    |    |
| GCAGCAGTGGGGAATATTGCACAATGGGCGC<br>AAGCCTGATGCAGCGACGCCGCGTGAGGGAT<br>ASV75 GACGGCCTTCGGGTTGTAAACCTCTGTTAGCA                                                                                                                                                  |                                  |  |  |  |  |  |  |  |  |  |  | 0 | 39 | 0 | 0 | 0 | 0 | 43 | 0 | 0  | 0 | 44 | 0 | 65 | 0  | 29 | 71 | 0  | 66 | 90 | 50 | 45 |    |
| 8                                                                                                                                                                                                                                                             | GGGAAGAAGAGAGATTGACGGTACCTGCAGA  |  |  |  |  |  |  |  |  |  |  | 8 |    |   |   |   | 4 |    | 1 |    | 6 |    | 4 | 2  | 9  |    |    |    |    |    |    |    |    |
| GAAAGCGCCGGCTAACTACGTGCCAGCAGCC<br>GCGGTAATACGTAGGGCGCGAGCGTTGTCCGG                                                                                                                                                                                           |                                  |  |  |  |  |  |  |  |  |  |  |   |    |   |   |   |   |    |   |    |   |    |   |    |    |    |    |    |    |    |    |    |    |



[illegible]

ACGGCCCTATGGGTTGTAAACTGCTTTTGTATG  
GGGATAAAGTCAATCACGTGTGATTGTTTGCA  
GGTACCATACGAATAAGGACCGGCTAATTCCG  
TGCCAGCAGCCGCGGTAATACGGAAGGTCCG  
GGCGTTATCCGGATTTATTGGGTTTAAAGGGA  
GCGTAGGCTGGAGATTAAGTGTGTTGTGAAAT  
GTAGACGCTCAACGTCTGACTTGCAGCGCATA  
CTGGTTTCCTTGAGTACGCACAACGTTGGCGG  
AATTCGTCGTGTAGCGGTGAAATGCTTAGATA  
TGACGAAGAACTCCGATTGCGAAGGCAGCTG  
ACGGGAGCGCAACTGACGCTGAAGCTCGAAG  
GTGCGGGTATCGAACAGGATTAGATAC  
GCTGCAGTGGGGAATCTTCCGCAATGGACGAA  
AGTCTGACGGAGCAACGCCGCGTGAGTGATG  
ACGGCCTTCGGGTTGTAAAGCTCTGTTAATCG  
GGACGAAAGGTCCTCTTGCGAATAGTTAGAGG  
AATTGACGGTACCGGAATAGAAAGCCACGGC  
TAACTACGTGCCAGCAGCCGCGGTAATACGTA  
GGTGGCAAGCGTTGTCCGGAATTATTGGGCGT  
AAAGCGCGCGCAGGCGGATCAGTTAGTCTGTC  
TTAAAAGTTCGGGGGCTTAACCCCGTGATGGGA  
TGGAAACTGCTGATCTAGAGTATCGGAGAGGA  
AAGTGGAATTCCTAGTGTAGCGGTGAAATGCG  
TAGATATTAGGAAGAACACCAGTGCCGAAGG  
CGACTTTCCTGGACGAAAACGTGACGCTGAGGCG  
CGAAAGCCAGGGGAGCGAACGGGATTAGATA  
C

|   |   |   |   |   |   |   |   |   |   |   |   |   |    |   |    |    |   |    |   |    |    |
|---|---|---|---|---|---|---|---|---|---|---|---|---|----|---|----|----|---|----|---|----|----|
| 0 | 0 | 0 | 0 | 0 | 0 | 0 | 0 | 0 | 0 | 0 | 0 | 0 | 51 | 0 | 30 | 19 | 0 | 15 | 0 | 42 | 66 |
|   |   |   |   |   |   |   |   |   |   |   |   |   |    |   | 3  | 1  | 0 | 3  | 0 | 9  | 9  |

[illegible]

GCTGCAGTGAGGAATATTGGTCAATGGGCGAG  
AGCCTGAACCAGCCAAGTCGCGTGAAGGATG  
ACTGTCTTATGGATTGTAACTTCTTTTATACG  
GGAATAACAAGAGTCACGTGTGGCTCCCTGCA  
TGTACCGTATGAATAAGCATCGGCTAACTCCG  
TGCCAGCAGCCGCGGTAATACGGAGGATGCG

AGCGTTATCCGGATTATTGGGTTTAAAGGGT  
GCGTAGGCGCCTGTTAAGTCAGCGGTGAAAT  
CTAGGAGCTTAACCTCTAAATTGCCATTGATA  
CTGGCGGGCTTGAGTGTAGATGAGGTAGGCGG  
AATGCGTGGTGTAGCGGTGGAATGCATAGATA  
TCACGCAGAACTCCGATTGCGAAGGCAGCTTA  
CTAAGGTACAACCTGACGCTGAAGCACGAAAG  
CGTGGGTATCAAACAGGATTAGATAC

|   |   |    |   |    |    |    |    |   |    |    |
|---|---|----|---|----|----|----|----|---|----|----|
| 0 | 0 | 36 | 0 | 42 | 51 | 21 | 92 | 0 | 32 | 30 |
|   |   |    |   | 2  |    | 1  |    |   | 3  | 7  |

GCTGCAGTGGGGAATATTGCACAATGGGCGA  
AAGCCTGATGCAGCAACGCCGCGTGAACGAT  
GAAGGTCTTCGGATCGTAAAGTTCTGTTGCAG  
GGGAAGATAATGACGGTACCCTGTGAGGAAG  
CCCCGGCTAACTACGTGCCAGCAGCCGCGGTA

ATACGTAGGGGGCTAGCGTTATCCGGATTTC  
TGGGCGTAAAGGGTGCGTAGGTGGTCCTTCAA  
GTCGGTGGTTAAAGGCTACGGCTCAACCGTAG  
TAAGCCGCCGAAACTGGAGGACTTGAGTGCA  
GGAGAGGAAAGTGGAATCCCAGTGTAGCGG  
TGAAATGCGTAGATATTGGGAGGAACACCAG

0 0 0 0 0 0 0 0 0 0

|   |   |   |    |    |    |    |    |   |    |    |
|---|---|---|----|----|----|----|----|---|----|----|
| 0 | 0 | 0 | 39 | 14 | 92 | 10 | 79 | 0 | 34 | 68 |
|   |   |   | 8  | 0  |    | 0  | 8  |   | 9  | 2  |

GCTGCAGTAGGGAATCTTCGGCAATGGGGGCA  
ACCCTGACCGAGCAACGCCGCGTGAGTGAAG  
AAGGTTTTCGGATCGTAAAGCTCTGTTGTAAGT  
CAAGAACGAGTGTGAGAGTGGAAAGTTCACA  
CTGTGACGGTAGCTTACCAGAAAGGGACGGCT  
AACTACGTGCCAGCAGCCGCGGTAATACGTA  
GGTCCCGAGCGTTGTCCGATTTATTGGGCGT  
AAAGCGAGCGCAGGCGGTTTGATAAGTCTGA  
AGTTAAAGGCTGTGGCTCAACCATAGTTCGCT  
TTGGAAACTGTCAAACCTTGAGTGCAGAAGGGG  
AGAGTGGAATTCCATGTGTAGCGGTGAAATGC  
GTAGATATATGGAGGAACACCGGTGGCGAAA  
GCGGCTCTCTGGTCTGTAAGTACGCTGAGGC  
TCGAAAGCGTGGGGAGCGAACAGGATTAGAT  
AC

0 0 0 0 0 0 0 0 0 0

ASV80  
9

0 0 0 0 0 0 0 0 0 0

|    |    |    |    |    |   |    |   |    |    |    |
|----|----|----|----|----|---|----|---|----|----|----|
| 92 | 42 | 19 |    |    |   | 16 |   | 17 |    |    |
|    | 4  | 3  | 55 | 78 | 0 | 2  | 0 | 4  | 88 | 75 |



[illegible]

[illegible]ASV83  
4

CTTAAGCGCAGGGTTTAAGGCAATGGCTCAAC  
 CATTGTTTCGCCTTGCGAACTGGGGTGCTTGAGT  
 GCAGGAGGGGAAAGTGGAATTCCTAGTGTAG  
 CCGTGAAATGCGTAGATATTAGGAGGAACAC  
 CAGTGGCGAAGGCGACTTTCTGGACTGTTACT  
 GACACTGAGGCACGAAAGCGTGGGGAGCAAA  
 CAGGATTAGATAC

GCTGCAGTGAGGAATATTGGTCAATGGATGCA  
 AATCTGAACCAGCCAAGTAGCGTGCAGGATG  
 ACGGCCCTATGGGTTGTAAACTGCTTTTATGTG  
 AGAATAAAGTTAGGTATGTATACTTATTTGCAT  
 GTATCACATGAATAAGGACCGGCTAATTCCGT  
 GCCAGCAGCCGCGGTAATACGGAAGGTCCAG  
 GCGTTATCCGATTATTATTGGGTTTAAAGGGTGC  
 GTAGGCCGTTTGATAAGCGTGCTGTGAAATAT  
 AGTGGCTCAACCTCTATCGTGCAGCGCGAACT  
 GTTGAACCTGAGTGCGTAGTAGGTAGGCGGAA  
 TTCGTGGTGTAGCGGTGAAATGCTTAGATATC  
 ACGAAGAAGTCCGATTGCGAAGGCAGCTTAC  
 CGTAACGTTACTGACGCTTAAGCACGAAGGTG  
 CGGGTATCGAACAGGATTAGATAC

GCTGCAGTAGGGAATCTTCCGCAATGGGCGAA  
 AGCCTGACGGAGCAACGCCGCGTGAGTGAAG  
 AAGGATTTTCGGTTCGTAAAGCTCTGTTGTTAGG  
 GAAGAATGATTGTATAGTAACTATATACAGTA  
 GAGACGGTACCTAACCAGAAAGCCACGGCTA  
 ACTACGTGCCAGCAGCCGCGGTAATACGTAGG

ASV84  
2

0 0 0 0 0 0 0 0 0 0 0 0

0 0 0 66 13 0 0 0 0 44 60  
2 4

ASV85  
2

0 0 0 0 0 0 0 0 0 0 0 0

11 0 44 41 61 15 34 0 27 69 14  
0 1

TGGCAAGCGTTGTCCGGAATTATTGGGCGTAA  
 AGCGCGCGCAGGTGGTTTAATAAGTCTGATGT  
 GAAAGCCCACGGCTCAACCGTGGAGGGTCATT  
 GGAAACTGTTAAACTTGAGTGCAGGAGAGAA  
 AAGTGGAATTCCTAGTGTAGCGGTGAAATGCG  
 TAGAGATTAGGAGGAACACCAGTGGCGAAGG  
 CGGCTTTTTGGCCTGTAAGTACACTGAGGCG  
 CGAAAGCGTGGGGAGCAAACAGGATTAGATA  
 C

GCTGCAGTGAGGAATATTGGTCAATGGGCGAG  
 AGCCTGAACCAGCCAAGTCGCGTGAAGGATG  
 ACTGTCTTATGGATTGTAACTTCTTTTATACG  
 GGAATAACAAGAGTCACGAGTGACTCCCTGC  
 ATGTACCGTATGAATAAGCATCGGCTAACTCC  
 GTGCCAGCAGCCGCGGTAATACGGAGGATGC  
 GAGCGTTATCCGGATTTATTGGGTTTAAAGGG  
 TGCGTAGGCGGCCTGTAAAGTCAGCGGTGAAA  
 TCTAGGAGCTTAACTCCTAAATTGCCATTGATA  
 CTGGCGGGCTTGAGTGTAGATGAGGTAGGCGG  
 AATGCGTGGTGTAGCGGTGGAATGCATAGATA  
 TCACGCAGAACTCCGATTGCGAAGGCAGCTTA  
 CTAAGGTACAAGTACGCTGAAGCACGAAAG  
 CGTGGGTATCAAACAGGATTAGATAC

GCAGCAGTGAGGAATATTGGTCAATGGGCGA  
 GAGCCTGAACCAGCCAAGTAGCGTGCAGGAT  
 GACGGCCCTCCGGGTTGTAACTGCTTTTAGTT  
 GGAATAAAAAAAGGGACGTGTCCCTTCTTGT

ASV85  
5

0 0 0 0 0 0 0 0 0 0 0 0  
 0 0 0 0 0 0 0 0 0 0 0 0

0 0 0 0 58 40 42 0 29 65 35  
 8 1

ASV85  
7

0 0 0 0 0 0 0 0 0 0 0 0

0 0 20 0 13 64 0 0 15 0  
 3 15 8

GCTGCAGTGAGGAATATTGGTCAATGGATGGA  
AATCTGAACCAGCCAAGTAGCGTGCAGGATG  
ACGGCCCTATGGGTTGTAACTGCTTTTATGTC  
AGAATAAAGTTAGGTATGTATACTTATTTGCAT  
GTATCACATGAATAAGGACCGGCTAATTCCGT  
GCCAGCAGCCGCGGTAATACGGAAGGTCCAG  
GCGTTATCCGGATTTATTGGGTTTAAAGGGTGC  
GTAGGCCGTTTGATAAGCGTGCTGTGAAATAT  
AGTGGCTCAACCTCTATCGTGCAGCGCAACT  
GTCGAAC TTGAGTGCGTAGTAGGTAGGCGGAA  
TTCGTGGTGTAGCGGTGAAATGCTTAGATATC  
ACGAAGA ACTCCGATTGCGAAGGCAGCTTAC  
CGTAACGTTACTGACGCTTAAGCACGAAGGTG  
CGGGTATCGAACAGGATTAGATAC

ASV86  
1

|    |    |    |   |    |    |    |    |    |    |
|----|----|----|---|----|----|----|----|----|----|
| 0  | 0  | 0  | 0 | 0  | 0  | 0  | 0  | 0  | 0  |
| 15 | 59 | 83 | 0 | 23 | 12 | 48 | 46 | 64 | 40 |
| 9  |    |    |   | 7  | 5  |    |    |    | 9  |

|    |   |    |    |    |    |    |    |    |    |    |
|----|---|----|----|----|----|----|----|----|----|----|
| 23 | 0 | 23 | 62 | 93 | 66 | 52 | 20 | 62 | 48 | 39 |
|----|---|----|----|----|----|----|----|----|----|----|

GCTGCAGTGGGGAATCTTGCACAATGGACGA  
AAGTCTGATGCAGCAATTTTCGCGTGAAGGATG  
AAGCATTACGGTGTGTAAACTTCTTTTTTGCA  
GAAGACGAATGACGGTATGTCAAGAATAAGA  
GACGGCTAACTACGTGCCAGCAGCCGCGGTA  
ATACGTAGGTCTCAAGCGTTGTCCGATTACT

GGGCGTAAAGTGTCCGTAGTCTGAATTGTAAG  
TCTGTTTTCAAATCCTACGACTCAATCGTAGAA  
AGGGAGTGGATACTGCAATTCTGGAAGTATCT  
GGGGGTAGTGGAATTTCCGGTGGAGCGGTGA  
AATGCGTTGATATCGGAAGGAACGCCGAAAG  
CGAAAGCAGCTAACTACAGAATACTTGACGA  
TGAGGGACGACAGTTCCGGTAGCAAACAGGA  
TTAGATAC

[illegible]

|   |   |    |    |    |    |    |    |   |    |    |
|---|---|----|----|----|----|----|----|---|----|----|
| 0 | 0 | 0  | 56 | 38 | 60 | 0  | 61 | 0 | 26 | 36 |
|   |   |    |    |    |    |    |    |   | 1  | 1  |
|   |   |    |    |    |    |    |    |   |    |    |
|   |   |    |    |    |    |    |    |   |    |    |
|   |   |    |    |    |    |    |    |   |    |    |
|   |   |    |    |    |    |    |    |   |    |    |
|   |   |    |    |    |    |    |    |   |    |    |
|   |   |    |    |    |    |    |    |   |    |    |
|   |   |    |    |    |    |    |    |   |    |    |
|   |   |    |    |    |    |    |    |   |    |    |
| 0 | 0 | 61 | 0  | 18 | 17 | 13 | 0  | 0 | 0  | 70 |
|   |   |    |    |    | 5  | 4  |    |   |    | 3  |

GCTGCAGTGGGGAATATTGGACAATGGAGGA  
GACTCTGATCCAGCAATTCTGTGTGCACGAAG

ACGGTTTTCGGATTGTAAAGTGCTTTCAGCAG  
GGAAGAAGAAAGTGACGGTACCTGCAGAAGA  
AGCGACGGCTAAATACGTGCCAGCAGCCGCG  
GTAATACGTATGTCGCGAGCGTTATCCGGAAT  
TATTGGGCATAAAGGGCATCTAGGCGGATATA  
CAAGTCAGGGGTGAAAACCTAGGGCTCAACTC  
AAAGCTTGCCTTTGAAACTGTATATCTAGAGT  
GCTGGAGAGGTGGACGGAACACACGAGTAG  
AGGTGAAATTCGTAGATATGTGTAGGAATGCC  
GATGATGAAGATAGTCCACTGGACAGCAACT  
GACGCTGAAGTGCGAAAGCTAGGGGAGCAAA  
CAGGATTAGATAC

GCTGCAGTAGGGAATATTGCTCAATGGGGGAA  
ACCCTGAAGCAGCAACGCCGCGTGGAGGATG  
ACACTTTTCGGAGCGTAAACTCCTTTTGTTAGG  
GAAGAACAATGACGGTACCTAACGAATAAGC  
ACCGGCTAACTCCGTGCCAGCAGCCGCGGTAA  
TACGGAGGGTGCAAGCGTTACTCGGAATCACT  
GGGCGTAAAGGACGCGTAGGCGGATTATCAA  
GTCTCTTGTGAAATCCTATGGCTTAACCATAGA  
ACTGCTTGGGAAACTGATAATCTAGAGTGAGG  
GAGAGGCAGATGGAATTGGTGGTGTAGGGGT  
AAAATCCGTAGAGATCACCAGGAATACCCATT  
GCGAAGGCGATCTGCTGGAACCTCAACTGACCG  
TAATGCGTGAAAGCGTGGGGAGCAAACAGGA  
TTAGATAC

ASV87  
8

|   |   |   |   |   |   |   |   |   |   |   |   |   |   |    |    |    |    |    |    |   |    |    |    |
|---|---|---|---|---|---|---|---|---|---|---|---|---|---|----|----|----|----|----|----|---|----|----|----|
| 0 | 0 | 0 | 0 | 0 | 0 | 0 | 0 | 0 | 0 | 0 | 0 | 0 | 0 | 89 | 74 | 37 | 38 | 61 | 37 | 0 | 92 | 61 | 11 |
|   |   |   |   |   |   |   |   |   |   |   |   |   |   |    |    |    |    |    |    |   |    |    | 4  |

[illegible]



|                                                |                                       |   |   |   |   |   |   |   |   |   |   |   |   |   |   |   |   |    |    |    |
|------------------------------------------------|---------------------------------------|---|---|---|---|---|---|---|---|---|---|---|---|---|---|---|---|----|----|----|
| CGTTGAGGCTCGAAAGCGTGGGGATCAAACA<br>GGATTAGATAC |                                       |   |   |   |   |   |   |   |   |   |   |   |   |   |   |   |   |    |    |    |
| ASV89<br>4                                     | GCTGCAGTAGGGAATCTTCCGCAATGGACGCA      |   |   |   |   |   |   |   |   |   |   |   |   |   |   |   |   |    |    |    |
|                                                | AGTCTGACGGAGCAACGCCGCGTGAGTGAAG       |   |   |   |   |   |   |   |   |   |   |   |   |   |   |   |   |    |    |    |
|                                                | AAGGATTTTCGGTTCGTAAAACTCTGTTGTTAGA    |   |   |   |   |   |   |   |   |   |   |   |   |   |   |   |   |    |    |    |
|                                                | GAAGAACAGCGCATAGAGTAACTGTTATGCGT      |   |   |   |   |   |   |   |   |   |   |   |   |   |   |   |   |    |    |    |
|                                                | GTGACGGTATCTAACCAGAAAGCCACGGCTA       |   |   |   |   |   |   |   |   |   |   |   |   |   |   |   |   |    |    |    |
|                                                | ACTACGTGCCAGCAGCCGCGGTAATACGTAGG      |   |   |   |   |   |   |   |   |   |   |   |   |   |   |   |   |    |    |    |
|                                                | TGGCAAGCGTTGTCCGATTTATTGGGCGTAA       |   |   |   |   |   |   |   |   |   |   |   |   |   |   |   |   |    |    |    |
|                                                | AGCGAGCGCAGGCGGTCAATTAAGTCTGATGT      | 0 | 0 | 0 | 0 | 0 | 0 | 0 | 0 | 0 | 0 | 0 | 0 | 0 | 0 | 0 | 0 | 14 | 19 | 0  |
|                                                | GAAAGCCCCCGGCTCAACCGGGGAGGGTCAT       |   |   |   |   |   |   |   |   |   |   |   |   |   |   |   |   | 7  |    |    |
|                                                | TGGAAACTGGTTGACTTGAGTGCAGAAGAGG       |   |   |   |   |   |   |   |   |   |   |   |   |   |   |   |   |    |    |    |
|                                                | AGAGTGGAATTCCATGTGTAGCGGTGAAATGC      |   |   |   |   |   |   |   |   |   |   |   |   |   |   |   |   |    |    |    |
|                                                | GTAGATATATGGAGGAACACCAGTGGCGAAG       |   |   |   |   |   |   |   |   |   |   |   |   |   |   |   |   |    |    |    |
|                                                | GCGACTCTCTGGTCTGTAACTGACGCTGAGGC      |   |   |   |   |   |   |   |   |   |   |   |   |   |   |   |   |    |    |    |
|                                                | TCGAAAGCGTGGGTAGCAAACAGGATTAGAT<br>AC |   |   |   |   |   |   |   |   |   |   |   |   |   |   |   |   |    |    |    |
| ASV89<br>6                                     | GCTGCAGTGGGGAATATTGCACAATGGGGGA       |   |   |   |   |   |   |   |   |   |   |   |   |   |   |   |   |    |    |    |
|                                                | AACCCTGATGCAGCGACGCCGCGTGAGCGAA       |   |   |   |   |   |   |   |   |   |   |   |   |   |   |   |   |    |    |    |
|                                                | GAAGGTTTTCGAATCGTAAAGCTCTGTCCTAT      |   |   |   |   |   |   |   |   |   |   |   |   |   |   |   |   |    |    |    |
|                                                | GAGAAGATAATGACGGTATCATAGGAGGAAG       |   |   |   |   |   |   |   |   |   |   |   |   |   |   |   |   |    |    |    |
|                                                | CCCCGGCTAAATACGTGCCAGCAGCCGCGGTA      | 0 | 0 | 0 | 0 | 0 | 0 | 0 | 0 | 0 | 0 | 0 | 0 | 0 | 0 | 0 | 0 | 17 | 10 |    |
|                                                | ATACGTATGGGGCGAGCGTTGTCCGGAATTAT      |   |   |   |   |   |   |   |   |   |   |   |   |   |   |   |   | 3  | 0  | 94 |
|                                                | TGGGCGTAAAGGGTACGTAGGCGGCCTTTTAA      |   |   |   |   |   |   |   |   |   |   |   |   |   |   |   |   |    |    |    |
|                                                | GTCAGGTGTGAAAGCGTGAGGCTTAACCTCAT      |   |   |   |   |   |   |   |   |   |   |   |   |   |   |   |   |    |    |    |
|                                                | TAAGCACTTGAAACTGGAAGGCTTGAGTGAA       |   |   |   |   |   |   |   |   |   |   |   |   |   |   |   |   |    |    |    |
|                                                | GGAGAGGAAAGTGGAATTCCTAGTGTAGCGG       |   |   |   |   |   |   |   |   |   |   |   |   |   |   |   |   |    |    |    |

|       |   |                                                                                                                                                                                                                                                                                                                               |   |   |   |   |   |   |   |   |   |   |   |    |    |    |   |    |    |         |   |         |    |    |
|-------|---|-------------------------------------------------------------------------------------------------------------------------------------------------------------------------------------------------------------------------------------------------------------------------------------------------------------------------------|---|---|---|---|---|---|---|---|---|---|---|----|----|----|---|----|----|---------|---|---------|----|----|
|       |   | TGAAATGCGTAGATATTAGGAGGAATACCGGT<br>GGCGAAGGCGACTTTCTGGACTTTTACTGACG<br>CTCAGGTACGAAAGCGTG GGGGAGCAAACAGG<br>ATTAGATAC                                                                                                                                                                                                        |   |   |   |   |   |   |   |   |   |   |   |    |    |    |   |    |    |         |   |         |    |    |
|       |   | GCTGCAGTGGGGAATATTGCACAATGGGCGC<br>AAGCCTGATGCAGCGACGCCGCGTGAGGGAT<br>GACGGCCTTCGGGTGTAAACCTCTGTTAGCA<br>TCGAAGAAGCGAAAGTGACGGTAGGTGCAGA<br>GAAAGCGCCGGCTAACTACGTGCCAGCAGCC<br>GCGGTAATACGTAGGGCGCGAGCGTTGTCCGG                                                                                                               |   |   |   |   |   |   |   |   |   |   |   |    |    |    |   |    |    |         |   |         |    |    |
| ASV90 | 1 | AATTATTGGGCGTAAAGAGCTTGTAGGCGGTT<br>GGTCGCGTCTGCTGTGAAAGGCTGGGGCTTAA<br>CCCTGGTTTTGCAGTGGGTACGGGCTAACTAG<br>AGTGCAGTAGGGGAGACTGGAATTCCTGGTGT<br>AGCGGTGGAATGCGCAGATATCAGGAGGAAC<br>ACCGATGGCGAAGGCAGGTCTCTGGGCTGTAA<br>CTGACGCTGAGAAGCGAAAGCATGGGGAGCG<br>AACAGGATTAGATAC                                                     | 0 | 0 | 0 | 0 | 0 | 0 | 0 | 0 | 0 | 0 | 0 | 99 | 0  | 42 | 0 | 55 | 0  | 0       | 0 | 18<br>0 | 23 | 21 |
|       |   | GCTGCAGTCGGGAATATTGCACAATGGAGGA<br>AACTCTGATGCAGTGACACCGCGTATAGGAAG<br>AAGGTCTTAGGATTGTAAGCTATTGTCGTGTG<br>AGAAGAAAATGACCATCACAGGAGGAAGCCC<br>TGGCTAAATATGTGCCAGCAGCCGCGGTAATA<br>CATATGGGGCGAGCGTTATCCGGATTTATTGG<br>GTGTAAAGGGTGCGTAGGCGGGAAAATAAGT<br>CAGTATGTGAAATCCCTCGGCTCAACTGAGGA<br>ACTGCAACTGAAACTATTTTCTTGAGTGTTGA | 0 | 0 | 0 | 0 | 0 | 0 | 0 | 0 | 0 | 0 | 0 | 0  | 37 | 0  | 0 | 74 | 92 | 13<br>9 | 0 | 0       | 95 | 99 |

|            |  |                                                                                                                                                                                                                                                                                                                                                                                                                                                                                              |   |   |   |   |   |   |   |   |   |   |   |   |   |   |   |   |   |   |   |   |   |   |   |   |   |   |   |   |   |   |   |   |   |   |   |   |   |   |   |   |   |   |   |   |   |   |   |   |   |   |   |   |   |   |   |   |   |   |   |   |   |   |   |   |   |   |   |   |   |   |   |   |   |   |   |   |   |   |   |   |   |   |   |   |   |   |   |   |   |   |   |   |   |   |   |   |   |   |   |   |   |   |   |   |   |   |   |   |   |   |   |   |   |   |   |   |   |   |   |   |   |   |   |   |   |   |   |   |   |   |   |   |   |   |   |   |   |   |   |   |   |   |   |   |   |   |   |   |   |   |   |   |   |   |   |   |   |   |   |   |   |   |   |   |   |   |   |   |   |   |   |   |   |   |   |   |   |   |   |   |   |   |   |   |   |   |   |   |   |   |   |   |   |   |   |   |   |   |   |   |   |   |   |   |   |   |   |   |   |   |   |   |   |   |   |   |   |   |   |   |   |   |   |   |   |   |   |   |   |   |   |   |   |   |   |   |   |   |   |   |   |   |   |   |   |   |   |   |   |   |   |   |   |   |   |   |   |   |   |   |   |   |   |   |   |   |   |   |   |   |   |   |   |   |   |   |   |   |   |   |   |   |   |   |   |   |   |   |   |   |   |   |   |   |   |   |   |   |   |   |   |   |   |   |   |   |   |   |   |   |   |   |   |   |   |   |   |   |   |   |   |   |   |   |   |   |   |   |   |   |   |   |   |   |   |   |   |   |   |   |   |   |   |   |   |   |   |   |   |   |   |   |   |   |   |   |   |   |   |   |   |   |   |   |   |   |   |   |   |   |   |   |   |   |   |   |   |   |   |   |   |   |   |   |   |   |   |   |   |   |   |   |   |   |   |   |   |   |   |   |   |   |   |   |   |   |   |   |   |   |   |   |   |   |   |   |   |   |   |   |   |   |   |   |   |   |   |   |   |   |   |   |   |   |   |   |   |   |   |   |   |   |   |   |   |   |   |   |   |   |   |   |   |   |   |   |   |   |   |   |   |   |   |   |   |   |   |   |   |   |   |   |   |   |   |   |   |   |   |   |   |   |   |   |   |   |   |   |   |   |   |   |   |   |   |   |   |   |   |   |   |   |   |   |   |   |   |   |   |   |   |   |   |   |   |   |   |   |   |   |   |   |   |   |   |   |   |   |   |   |   |   |   |   |   |   |   |   |   |   |   |   |   |   |   |   |   |   |   |   |   |   |   |   |   |   |   |   |   |   |   |   |   |   |   |   |   |   |   |   |   |   |   |   |   |   |   |   |   |   |   |   |   |   |   |   |   |   |   |   |   |   |   |   |   |   |   |   |   |   |   |   |   |   |   |   |   |   |   |   |   |   |   |   |   |   |   |   |   |   |   |   |   |   |   |   |   |   |   |   |   |   |   |   |   |   |   |   |   |   |   |   |   |   |   |   |   |   |   |   |   |   |   |   |   |   |   |   |   |   |   |   |   |   |   |   |   |   |   |   |   |   |   |   |   |   |   |   |   |   |   |   |   |   |   |   |   |   |   |   |   |   |   |   |   |   |   |   |   |   |   |   |   |   |   |   |   |   |   |   |   |   |   |   |   |   |   |   |   |   |   |   |   |   |   |   |   |   |   |   |   |   |   |   |   |   |   |   |   |   |   |   |   |   |   |   |   |   |   |   |   |   |   |   |   |   |   |   |   |   |   |   |   |   |   |   |   |   |   |   |   |   |   |   |   |   |   |   |   |   |   |   |   |   |   |   |   |   |   |   |   |   |   |   |   |   |   |   |   |   |   |   |   |   |   |   |   |   |   |   |   |   |   |   |   |   |   |   |   |   |   |   |   |   |   |   |   |   |   |   |   |   |   |   |   |   |   |   |   |   |   |   |   |   |   |   |   |   |   |   |   |   |   |   |   |   |   |   |   |   |   |   |   |   |   |   |   |   |   |   |   |   |   |   |   |   |   |   |   |   |   |   |   |   |   |   |   |   |   |   |   |   |   |   |   |   |   |   |   |   |   |   |   |   |   |   |   |   |   |   |   |   |   |   |   |   |   |   |   |   |   |   |   |   |   |   |   |   |   |   |   |   |   |   |   |   |   |   |   |   |   |   |   |   |   |   |   |   |   |   |   |   |   |   |   |   |   |   |   |   |   |   |   |   |   |   |   |   |   |   |   |   |   |   |   |   |   |   |   |   |   |   |   |   |   |   |   |   |   |   |   |   |   |   |   |   |   |   |   |   |   |   |   |   |   |   |   |   |   |   |   |   |   |   |   |   |   |   |   |   |   |   |   |   |   |   |   |   |   |   |   |   |   |   |   |   |   |   |   |   |   |   |   |   |   |   |   |   |   |   |   |   |   |   |   |   |   |   |   |   |   |   |   |   |   |   |   |   |   |   |   |   |   |   |   |   |   |   |   |   |   |   |   |   |   |   |   |   |   |   |   |   |   |   |   |   |   |   |   |   |   |   |   |   |   |   |   |   |   |   |   |   |   |   |   |   |   |   |   |   |   |   |   |   |   |   |   |   |   |   |   |   |   |   |   |   |   |   |   |   |   |   |   |   |   |   |   |   |   |   |   |   |   |   |   |   |   |   |   |   |   |   |   |   |   |   |   |   |   |   |   |   |   |   |   |   |   |   |   |   |   |   |   |   |   |   |   |   |   |   |   |   |   |   |   |   |   |   |   |   |   |   |   |   |   |   |   |   |   |   |   |   |   |   |   |   |   |   |   |   |   |   |   |   |   |   |   |   |   |   |   |   |   |   |   |   |   |   |   |   |   |   |   |   |   |   |   |   |   |   |   |   |   |   |   |   |   |   |   |   |   |   |   |   |   |   |   |   |   |   |   |   |   |   |   |   |   |   |   |   |   |   |   |   |   |   |   |   |   |   |   |   |   |   |   |   |   |   |   |   |   |   |   |   |   |   |   |   |   |   |   |   |   |   |   |   |   |   |   |   |   |   |   |   |   |   |   |
|------------|--|----------------------------------------------------------------------------------------------------------------------------------------------------------------------------------------------------------------------------------------------------------------------------------------------------------------------------------------------------------------------------------------------------------------------------------------------------------------------------------------------|---|---|---|---|---|---|---|---|---|---|---|---|---|---|---|---|---|---|---|---|---|---|---|---|---|---|---|---|---|---|---|---|---|---|---|---|---|---|---|---|---|---|---|---|---|---|---|---|---|---|---|---|---|---|---|---|---|---|---|---|---|---|---|---|---|---|---|---|---|---|---|---|---|---|---|---|---|---|---|---|---|---|---|---|---|---|---|---|---|---|---|---|---|---|---|---|---|---|---|---|---|---|---|---|---|---|---|---|---|---|---|---|---|---|---|---|---|---|---|---|---|---|---|---|---|---|---|---|---|---|---|---|---|---|---|---|---|---|---|---|---|---|---|---|---|---|---|---|---|---|---|---|---|---|---|---|---|---|---|---|---|---|---|---|---|---|---|---|---|---|---|---|---|---|---|---|---|---|---|---|---|---|---|---|---|---|---|---|---|---|---|---|---|---|---|---|---|---|---|---|---|---|---|---|---|---|---|---|---|---|---|---|---|---|---|---|---|---|---|---|---|---|---|---|---|---|---|---|---|---|---|---|---|---|---|---|---|---|---|---|---|---|---|---|---|---|---|---|---|---|---|---|---|---|---|---|---|---|---|---|---|---|---|---|---|---|---|---|---|---|---|---|---|---|---|---|---|---|---|---|---|---|---|---|---|---|---|---|---|---|---|---|---|---|---|---|---|---|---|---|---|---|---|---|---|---|---|---|---|---|---|---|---|---|---|---|---|---|---|---|---|---|---|---|---|---|---|---|---|---|---|---|---|---|---|---|---|---|---|---|---|---|---|---|---|---|---|---|---|---|---|---|---|---|---|---|---|---|---|---|---|---|---|---|---|---|---|---|---|---|---|---|---|---|---|---|---|---|---|---|---|---|---|---|---|---|---|---|---|---|---|---|---|---|---|---|---|---|---|---|---|---|---|---|---|---|---|---|---|---|---|---|---|---|---|---|---|---|---|---|---|---|---|---|---|---|---|---|---|---|---|---|---|---|---|---|---|---|---|---|---|---|---|---|---|---|---|---|---|---|---|---|---|---|---|---|---|---|---|---|---|---|---|---|---|---|---|---|---|---|---|---|---|---|---|---|---|---|---|---|---|---|---|---|---|---|---|---|---|---|---|---|---|---|---|---|---|---|---|---|---|---|---|---|---|---|---|---|---|---|---|---|---|---|---|---|---|---|---|---|---|---|---|---|---|---|---|---|---|---|---|---|---|---|---|---|---|---|---|---|---|---|---|---|---|---|---|---|---|---|---|---|---|---|---|---|---|---|---|---|---|---|---|---|---|---|---|---|---|---|---|---|---|---|---|---|---|---|---|---|---|---|---|---|---|---|---|---|---|---|---|---|---|---|---|---|---|---|---|---|---|---|---|---|---|---|---|---|---|---|---|---|---|---|---|---|---|---|---|---|---|---|---|---|---|---|---|---|---|---|---|---|---|---|---|---|---|---|---|---|---|---|---|---|---|---|---|---|---|---|---|---|---|---|---|---|---|---|---|---|---|---|---|---|---|---|---|---|---|---|---|---|---|---|---|---|---|---|---|---|---|---|---|---|---|---|---|---|---|---|---|---|---|---|---|---|---|---|---|---|---|---|---|---|---|---|---|---|---|---|---|---|---|---|---|---|---|---|---|---|---|---|---|---|---|---|---|---|---|---|---|---|---|---|---|---|---|---|---|---|---|---|---|---|---|---|---|---|---|---|---|---|---|---|---|---|---|---|---|---|---|---|---|---|---|---|---|---|---|---|---|---|---|---|---|---|---|---|---|---|---|---|---|---|---|---|---|---|---|---|---|---|---|---|---|---|---|---|---|---|---|---|---|---|---|---|---|---|---|---|---|---|---|---|---|---|---|---|---|---|---|---|---|---|---|---|---|---|---|---|---|---|---|---|---|---|---|---|---|---|---|---|---|---|---|---|---|---|---|---|---|---|---|---|---|---|---|---|---|---|---|---|---|---|---|---|---|---|---|---|---|---|---|---|---|---|---|---|---|---|---|---|---|---|---|---|---|---|---|---|---|---|---|---|---|---|---|---|---|---|---|---|---|---|---|---|---|---|---|---|---|---|---|---|---|---|---|---|---|---|---|---|---|---|---|---|---|---|---|---|---|---|---|---|---|---|---|---|---|---|---|---|---|---|---|---|---|---|---|---|---|---|---|---|---|---|---|---|---|---|---|---|---|---|---|---|---|---|---|---|---|---|---|---|---|---|---|---|---|---|---|---|---|---|---|---|---|---|---|---|---|---|---|---|---|---|---|---|---|---|---|---|---|---|---|---|---|---|---|---|---|---|---|---|---|---|---|---|---|---|---|---|---|---|---|---|---|---|---|---|---|---|---|---|---|---|---|---|---|---|---|---|---|---|---|---|---|---|---|---|---|---|---|---|---|---|---|---|---|---|---|---|---|---|---|---|---|---|---|---|---|---|---|---|---|---|---|---|---|---|---|---|---|---|---|---|---|---|---|---|---|---|---|---|---|---|---|---|---|---|---|---|---|---|---|---|---|---|---|---|---|---|---|---|---|---|---|---|---|---|---|---|---|---|---|---|---|---|---|---|---|---|---|---|---|---|---|---|---|---|---|---|---|---|---|---|---|---|---|---|---|---|---|---|---|---|---|---|---|---|---|---|---|---|---|---|---|---|---|---|---|---|---|---|---|---|---|---|---|---|---|---|---|---|---|---|---|---|---|---|---|---|---|---|---|---|---|---|---|---|---|---|---|---|---|---|---|---|---|---|---|---|---|---|---|---|---|---|---|---|---|---|---|---|---|---|---|---|---|---|---|---|---|---|---|---|---|---|---|---|---|---|---|---|---|---|---|---|---|---|---|---|---|---|---|---|---|---|---|---|---|---|---|---|---|---|---|---|---|---|---|---|---|---|---|---|---|---|---|---|---|---|---|---|---|---|---|---|---|---|---|---|---|---|---|---|---|---|---|---|---|---|---|---|---|---|---|---|---|---|---|---|---|---|---|---|---|---|---|---|---|---|---|---|---|---|---|
|            |  | AGGGGAAAGTGAATTCCTAGTGTAGCGGTG<br>AAATGCGTAGAGATTAGGAGGAACACCAGTG<br>GCGAAGGCGACTTTCTGGGCAACAACCTGACGC<br>TGAGGCACGAAAGTGTGGGGAGCAAACAGGA<br>TTAGATAC                                                                                                                                                                                                                                                                                                                                        |   |   |   |   |   |   |   |   |   |   |   |   |   |   |   |   |   |   |   |   |   |   |   |   |   |   |   |   |   |   |   |   |   |   |   |   |   |   |   |   |   |   |   |   |   |   |   |   |   |   |   |   |   |   |   |   |   |   |   |   |   |   |   |   |   |   |   |   |   |   |   |   |   |   |   |   |   |   |   |   |   |   |   |   |   |   |   |   |   |   |   |   |   |   |   |   |   |   |   |   |   |   |   |   |   |   |   |   |   |   |   |   |   |   |   |   |   |   |   |   |   |   |   |   |   |   |   |   |   |   |   |   |   |   |   |   |   |   |   |   |   |   |   |   |   |   |   |   |   |   |   |   |   |   |   |   |   |   |   |   |   |   |   |   |   |   |   |   |   |   |   |   |   |   |   |   |   |   |   |   |   |   |   |   |   |   |   |   |   |   |   |   |   |   |   |   |   |   |   |   |   |   |   |   |   |   |   |   |   |   |   |   |   |   |   |   |   |   |   |   |   |   |   |   |   |   |   |   |   |   |   |   |   |   |   |   |   |   |   |   |   |   |   |   |   |   |   |   |   |   |   |   |   |   |   |   |   |   |   |   |   |   |   |   |   |   |   |   |   |   |   |   |   |   |   |   |   |   |   |   |   |   |   |   |   |   |   |   |   |   |   |   |   |   |   |   |   |   |   |   |   |   |   |   |   |   |   |   |   |   |   |   |   |   |   |   |   |   |   |   |   |   |   |   |   |   |   |   |   |   |   |   |   |   |   |   |   |   |   |   |   |   |   |   |   |   |   |   |   |   |   |   |   |   |   |   |   |   |   |   |   |   |   |   |   |   |   |   |   |   |   |   |   |   |   |   |   |   |   |   |   |   |   |   |   |   |   |   |   |   |   |   |   |   |   |   |   |   |   |   |   |   |   |   |   |   |   |   |   |   |   |   |   |   |   |   |   |   |   |   |   |   |   |   |   |   |   |   |   |   |   |   |   |   |   |   |   |   |   |   |   |   |   |   |   |   |   |   |   |   |   |   |   |   |   |   |   |   |   |   |   |   |   |   |   |   |   |   |   |   |   |   |   |   |   |   |   |   |   |   |   |   |   |   |   |   |   |   |   |   |   |   |   |   |   |   |   |   |   |   |   |   |   |   |   |   |   |   |   |   |   |   |   |   |   |   |   |   |   |   |   |   |   |   |   |   |   |   |   |   |   |   |   |   |   |   |   |   |   |   |   |   |   |   |   |   |   |   |   |   |   |   |   |   |   |   |   |   |   |   |   |   |   |   |   |   |   |   |   |   |   |   |   |   |   |   |   |   |   |   |   |   |   |   |   |   |   |   |   |   |   |   |   |   |   |   |   |   |   |   |   |   |   |   |   |   |   |   |   |   |   |   |   |   |   |   |   |   |   |   |   |   |   |   |   |   |   |   |   |   |   |   |   |   |   |   |   |   |   |   |   |   |   |   |   |   |   |   |   |   |   |   |   |   |   |   |   |   |   |   |   |   |   |   |   |   |   |   |   |   |   |   |   |   |   |   |   |   |   |   |   |   |   |   |   |   |   |   |   |   |   |   |   |   |   |   |   |   |   |   |   |   |   |   |   |   |   |   |   |   |   |   |   |   |   |   |   |   |   |   |   |   |   |   |   |   |   |   |   |   |   |   |   |   |   |   |   |   |   |   |   |   |   |   |   |   |   |   |   |   |   |   |   |   |   |   |   |   |   |   |   |   |   |   |   |   |   |   |   |   |   |   |   |   |   |   |   |   |   |   |   |   |   |   |   |   |   |   |   |   |   |   |   |   |   |   |   |   |   |   |   |   |   |   |   |   |   |   |   |   |   |   |   |   |   |   |   |   |   |   |   |   |   |   |   |   |   |   |   |   |   |   |   |   |   |   |   |   |   |   |   |   |   |   |   |   |   |   |   |   |   |   |   |   |   |   |   |   |   |   |   |   |   |   |   |   |   |   |   |   |   |   |   |   |   |   |   |   |   |   |   |   |   |   |   |   |   |   |   |   |   |   |   |   |   |   |   |   |   |   |   |   |   |   |   |   |   |   |   |   |   |   |   |   |   |   |   |   |   |   |   |   |   |   |   |   |   |   |   |   |   |   |   |   |   |   |   |   |   |   |   |   |   |   |   |   |   |   |   |   |   |   |   |   |   |   |   |   |   |   |   |   |   |   |   |   |   |   |   |   |   |   |   |   |   |   |   |   |   |   |   |   |   |   |   |   |   |   |   |   |   |   |   |   |   |   |   |   |   |   |   |   |   |   |   |   |   |   |   |   |   |   |   |   |   |   |   |   |   |   |   |   |   |   |   |   |   |   |   |   |   |   |   |   |   |   |   |   |   |   |   |   |   |   |   |   |   |   |   |   |   |   |   |   |   |   |   |   |   |   |   |   |   |   |   |   |   |   |   |   |   |   |   |   |   |   |   |   |   |   |   |   |   |   |   |   |   |   |   |   |   |   |   |   |   |   |   |   |   |   |   |   |   |   |   |   |   |   |   |   |   |   |   |   |   |   |   |   |   |   |   |   |   |   |   |   |   |   |   |   |   |   |   |   |   |   |   |   |   |   |   |   |   |   |   |   |   |   |   |   |   |   |   |   |   |   |   |   |   |   |   |   |   |   |   |   |   |   |   |   |   |   |   |   |   |   |   |   |   |   |   |   |   |   |   |   |   |   |   |   |   |   |   |   |   |   |   |   |   |   |   |   |   |   |   |   |   |   |   |   |   |   |   |   |   |   |   |   |   |   |   |   |   |   |   |   |   |   |   |   |   |   |   |   |   |   |   |   |   |   |   |   |   |   |   |   |   |   |   |   |   |   |   |   |   |   |   |   |   |   |   |   |   |   |   |   |   |   |   |   |   |   |   |   |   |   |   |   |   |   |   |   |   |   |   |   |   |   |   |   |   |   |   |   |   |   |   |   |   |   |   |   |   |   |   |   |   |   |   |   |   |   |   |   |   |   |   |   |   |   |   |   |   |   |   |   |   |
| ASV90<br>6 |  | GCTGCAGTGGGGAATATTGGACAATGGGGGC<br>AACCCTGATCCAGCAATTCTGTGTGCACGAAG<br>ACGGTTTTTCGGATTGTAAAGTGCTTTCAGCAG<br>GGAAGAAGGAAGTGACGGTACCTGCAGAAGA<br>AGCGACGGCTAAATACGTGCCAGCAGCCGCG<br>GTAATACGTATGTCGCGAGCGTTATCCGGAAT<br>TATTGGGCATAAAGGGCATCTAGGCGGCCTTT<br>CAAGTCAGGGGTGAAAACCTGCGGCTCAACC<br>GCAGGCCTGCCTTTGAAACTGATAGGCTGGAG<br>TACCGGAGAGGTGGACGGAAGTGCACGAGTA<br>GAGGTGAAATTCGTAGATATGTGCAGGAATGC<br>CGATGATGAAGATAGTTCACTGGACGGTAACT<br>GACGCTGAAGTGCGAAAGCCGGGGGAGCGAA<br>CAGGATTAGATAC | 0 | 0 | 0 | 0 | 0 | 0 | 0 | 0 | 0 | 0 | 0 | 0 | 0 | 0 | 0 | 0 | 0 | 0 | 0 | 0 | 0 | 0 | 0 | 0 | 0 | 0 | 0 | 0 | 0 | 0 | 0 | 0 | 0 | 0 | 0 | 0 | 0 | 0 | 0 | 0 | 0 | 0 | 0 | 0 | 0 | 0 | 0 | 0 | 0 | 0 | 0 | 0 | 0 | 0 | 0 | 0 | 0 | 0 | 0 | 0 | 0 | 0 | 0 | 0 | 0 | 0 | 0 | 0 | 0 | 0 | 0 | 0 | 0 | 0 | 0 | 0 | 0 | 0 | 0 | 0 | 0 | 0 | 0 | 0 | 0 | 0 | 0 | 0 | 0 | 0 | 0 | 0 | 0 | 0 | 0 | 0 | 0 | 0 | 0 | 0 | 0 | 0 | 0 | 0 | 0 | 0 | 0 | 0 | 0 | 0 | 0 | 0 | 0 | 0 | 0 | 0 | 0 | 0 | 0 | 0 | 0 | 0 | 0 | 0 | 0 | 0 | 0 | 0 | 0 | 0 | 0 | 0 | 0 | 0 | 0 | 0 | 0 | 0 | 0 | 0 | 0 | 0 | 0 | 0 | 0 | 0 | 0 | 0 | 0 | 0 | 0 | 0 | 0 | 0 | 0 | 0 | 0 | 0 | 0 | 0 | 0 | 0 | 0 | 0 | 0 | 0 | 0 | 0 | 0 | 0 | 0 | 0 | 0 | 0 | 0 | 0 | 0 | 0 | 0 | 0 | 0 | 0 | 0 | 0 | 0 | 0 | 0 | 0 | 0 | 0 | 0 | 0 | 0 | 0 | 0 | 0 | 0 | 0 | 0 | 0 | 0 | 0 | 0 | 0 | 0 | 0 | 0 | 0 | 0 | 0 | 0 | 0 | 0 | 0 | 0 | 0 | 0 | 0 | 0 | 0 | 0 | 0 | 0 | 0 | 0 | 0 | 0 | 0 | 0 | 0 | 0 | 0 | 0 | 0 | 0 | 0 | 0 | 0 | 0 | 0 | 0 | 0 | 0 | 0 | 0 | 0 | 0 | 0 | 0 | 0 | 0 | 0 | 0 | 0 | 0 | 0 | 0 | 0 | 0 | 0 | 0 | 0 | 0 | 0 | 0 | 0 | 0 | 0 | 0 | 0 | 0 | 0 | 0 | 0 | 0 | 0 | 0 | 0 | 0 | 0 | 0 | 0 | 0 | 0 | 0 | 0 | 0 | 0 | 0 | 0 | 0 | 0 | 0 | 0 | 0 | 0 | 0 | 0 | 0 | 0 | 0 | 0 | 0 | 0 | 0 | 0 | 0 | 0 | 0 | 0 | 0 | 0 | 0 | 0 | 0 | 0 | 0 | 0 | 0 | 0 | 0 | 0 | 0 | 0 | 0 | 0 | 0 | 0 | 0 | 0 | 0 | 0 | 0 | 0 | 0 | 0 | 0 | 0 | 0 | 0 | 0 | 0 | 0 | 0 | 0 | 0 | 0 | 0 | 0 | 0 | 0 | 0 | 0 | 0 | 0 | 0 | 0 | 0 | 0 | 0 | 0 | 0 | 0 | 0 | 0 | 0 | 0 | 0 | 0 | 0 | 0 | 0 | 0 | 0 | 0 | 0 | 0 | 0 | 0 | 0 | 0 | 0 | 0 | 0 | 0 | 0 | 0 | 0 | 0 | 0 | 0 | 0 | 0 | 0 | 0 | 0 | 0 | 0 | 0 | 0 | 0 | 0 | 0 | 0 | 0 | 0 | 0 | 0 | 0 | 0 | 0 | 0 | 0 | 0 | 0 | 0 | 0 | 0 | 0 | 0 | 0 | 0 | 0 | 0 | 0 | 0 | 0 | 0 | 0 | 0 | 0 | 0 | 0 | 0 | 0 | 0 | 0 | 0 | 0 | 0 | 0 | 0 | 0 | 0 | 0 | 0 | 0 | 0 | 0 | 0 | 0 | 0 | 0 | 0 | 0 | 0 | 0 | 0 | 0 | 0 | 0 | 0 | 0 | 0 | 0 | 0 | 0 | 0 | 0 | 0 | 0 | 0 | 0 | 0 | 0 | 0 | 0 | 0 | 0 | 0 | 0 | 0 | 0 | 0 | 0 | 0 | 0 | 0 | 0 | 0 | 0 | 0 | 0 | 0 | 0 | 0 | 0 | 0 | 0 | 0 | 0 | 0 | 0 | 0 | 0 | 0 | 0 | 0 | 0 | 0 | 0 | 0 | 0 | 0 | 0 | 0 | 0 | 0 | 0 | 0 | 0 | 0 | 0 | 0 | 0 | 0 | 0 | 0 | 0 | 0 | 0 | 0 | 0 | 0 | 0 | 0 | 0 | 0 | 0 | 0 | 0 | 0 | 0 | 0 | 0 | 0 | 0 | 0 | 0 | 0 | 0 | 0 | 0 | 0 | 0 | 0 | 0 | 0 | 0 | 0 | 0 | 0 | 0 | 0 | 0 | 0 | 0 | 0 | 0 | 0 | 0 | 0 | 0 | 0 | 0 | 0 | 0 | 0 | 0 | 0 | 0 | 0 | 0 | 0 | 0 | 0 | 0 | 0 | 0 | 0 | 0 | 0 | 0 | 0 | 0 | 0 | 0 | 0 | 0 | 0 | 0 | 0 | 0 | 0 | 0 | 0 | 0 | 0 | 0 | 0 | 0 | 0 | 0 | 0 | 0 | 0 | 0 | 0 | 0 | 0 | 0 | 0 | 0 | 0 | 0 | 0 | 0 | 0 | 0 | 0 | 0 | 0 | 0 | 0 | 0 | 0 | 0 | 0 | 0 | 0 | 0 | 0 | 0 | 0 | 0 | 0 | 0 | 0 | 0 | 0 | 0 | 0 | 0 | 0 | 0 | 0 | 0 | 0 | 0 | 0 | 0 | 0 | 0 | 0 | 0 | 0 | 0 | 0 | 0 | 0 | 0 | 0 | 0 | 0 | 0 | 0 | 0 | 0 | 0 | 0 | 0 | 0 | 0 | 0 | 0 | 0 | 0 | 0 | 0 | 0 | 0 | 0 | 0 | 0 | 0 | 0 | 0 | 0 | 0 | 0 | 0 | 0 | 0 | 0 | 0 | 0 | 0 | 0 | 0 | 0 | 0 | 0 | 0 | 0 | 0 | 0 | 0 | 0 | 0 | 0 | 0 | 0 | 0 | 0 | 0 | 0 | 0 | 0 | 0 | 0 | 0 | 0 | 0 | 0 | 0 | 0 | 0 | 0 | 0 | 0 | 0 | 0 | 0 | 0 | 0 | 0 | 0 | 0 | 0 | 0 | 0 | 0 | 0 | 0 | 0 | 0 | 0 | 0 | 0 | 0 | 0 | 0 | 0 | 0 | 0 | 0 | 0 | 0 | 0 | 0 | 0 | 0 | 0 | 0 | 0 | 0 | 0 | 0 | 0 | 0 | 0 | 0 | 0 | 0 | 0 | 0 | 0 | 0 | 0 | 0 | 0 | 0 | 0 | 0 | 0 | 0 | 0 | 0 | 0 | 0 | 0 | 0 | 0 | 0 | 0 | 0 | 0 | 0 | 0 | 0 | 0 | 0 | 0 | 0 | 0 | 0 | 0 | 0 | 0 | 0 | 0 | 0 | 0 | 0 | 0 | 0 | 0 | 0 | 0 | 0 | 0 | 0 | 0 | 0 | 0 | 0 | 0 | 0 | 0 | 0 | 0 | 0 | 0 | 0 | 0 | 0 | 0 | 0 | 0 | 0 | 0 | 0 | 0 | 0 | 0 | 0 | 0 | 0 | 0 | 0 | 0 | 0 | 0 | 0 | 0 | 0 | 0 | 0 | 0 | 0 | 0 | 0 | 0 | 0 | 0 | 0 | 0 | 0 | 0 | 0 | 0 | 0 | 0 | 0 | 0 | 0 | 0 | 0 | 0 | 0 | 0 | 0 | 0 | 0 | 0 | 0 | 0 | 0 | 0 | 0 | 0 | 0 | 0 | 0 | 0 | 0 | 0 | 0 | 0 | 0 | 0 | 0 | 0 | 0 | 0 | 0 | 0 | 0 | 0 | 0 | 0 | 0 | 0 | 0 | 0 | 0 | 0 | 0 | 0 | 0 | 0 | 0 | 0 | 0 | 0 | 0 | 0 | 0 | 0 | 0 | 0 | 0 | 0 | 0 | 0 | 0 | 0 | 0 | 0 | 0 | 0 | 0 | 0 | 0 | 0 | 0 | 0 | 0 | 0 | 0 | 0 | 0 | 0 | 0 | 0 | 0 | 0 | 0 | 0 | 0 | 0 | 0 | 0 | 0 | 0 | 0 | 0 | 0 | 0 | 0 | 0 | 0 | 0 | 0 | 0 | 0 | 0 | 0 | 0 | 0 | 0 | 0 | 0 | 0 | 0 | 0 | 0 | 0 | 0 | 0 | 0 | 0 | 0 | 0 | 0 | 0 | 0 | 0 | 0 | 0 | 0 | 0 | 0 | 0 | 0 | 0 | 0 | 0 | 0 | 0 | 0 | 0 | 0 | 0 | 0 | 0 | 0 | 0 | 0 | 0 | 0 | 0 | 0 | 0 | 0 | 0 | 0 | 0 | 0 | 0 | 0 | 0 | 0 | 0 | 0 | 0 | 0 | 0 | 0 | 0 | 0 | 0 | 0 | 0 | 0 | 0 | 0 | 0 | 0 | 0 | 0 | 0 | 0 | 0 | 0 | 0 | 0 | 0 | 0 | 0 | 0 | 0 | 0 | 0 | 0 | 0 | 0 | 0 | 0 | 0 | 0 | 0 | 0 | 0 | 0 | 0 | 0 | 0 | 0 | 0 | 0 | 0 | 0 | 0 | 0 | 0 | 0 | 0 | 0 | 0 | 0 | 0 | 0 | 0 | 0 | 0 | 0 | 0 | 0 | 0 | 0 | 0 | 0 | 0 | 0 | 0 | 0 | 0 | 0 | 0 | 0 | 0 | 0 | 0 | 0 | 0 | 0 | 0 | 0 | 0 | 0 | 0 | 0 | 0 | 0 | 0 | 0 | 0 | 0 | 0 | 0 | 0 | 0 | 0 | 0 | 0 | 0 | 0 | 0 | 0 | 0 | 0 | 0 | 0 | 0 | 0 | 0 | 0 | 0 | 0 | 0 | 0 | 0 | 0 | 0 | 0 | 0 | 0 | 0 | 0 | 0 | 0 | 0 | 0 | 0 | 0 | 0 | 0 | 0 | 0 | 0 | 0 | 0 | 0 | 0 | 0 | 0 | 0 | 0 | 0 | 0 | 0 | 0 | 0 | 0 | 0 | 0 | 0 | 0 | 0 | 0 | 0 | 0 | 0 | 0 | 0 | 0 | 0 | 0 | 0 | 0 | 0 | 0 | 0 | 0 | 0 | 0 | 0 | 0 | 0 | 0 | 0 | 0 | 0 | 0 | 0 | 0 | 0 | 0 | 0 | 0 | 0 | 0 | 0 | 0 | 0 | 0 | 0 | 0 | 0 | 0 | 0 | 0 | 0 | 0 | 0 | 0 | 0 | 0 | 0 | 0 | 0 | 0 | 0 | 0 | 0 | 0 | 0 | 0 | 0 | 0 | 0 | 0 | 0 | 0 | 0 | 0 | 0 | 0 | 0 | 0 | 0 | 0 | 0 | 0 | 0 | 0 | 0 | 0 | 0 | 0 | 0 | 0 | 0 | 0 | 0 | 0 | 0 | 0 | 0 | 0 | 0 | 0 | 0 | 0 | 0 | 0 | 0 | 0 | 0 | 0 | 0 | 0 | 0 | 0 | 0 | 0 | 0 | 0 | 0 | 0 | 0 | 0 | 0 | 0 | 0 | 0 | 0 | 0 | 0 | 0 | 0 | 0 | 0 | 0 | 0 | 0 |

|       |   |                                                                                                                                                                                                                                                                                      |   |   |   |   |   |   |   |   |   |   |   |         |    |    |   |         |   |   |    |   |    |
|-------|---|--------------------------------------------------------------------------------------------------------------------------------------------------------------------------------------------------------------------------------------------------------------------------------------|---|---|---|---|---|---|---|---|---|---|---|---------|----|----|---|---------|---|---|----|---|----|
|       |   | AAGTTAAAGGCTGTGGCTTAACCATAGTATGC<br>TTTGAAACTGTTTAACTTGAGTGCAGAAGGG<br>GAGAGTGAATTCCATGTGTAGCGGTGAAATG<br>CGTAGATATATGGAGGAACACCGGTGGCGAA<br>AGCGGCTCTCTGGTCTGTAAGTACGCTGAGG<br>CTCGAAAGCGTGGGGAGCAAACAGGATTAGA<br>TAC                                                               |   |   |   |   |   |   |   |   |   |   |   |         |    |    |   |         |   |   |    |   |    |
|       |   | GCAGCAGTGAGGAATATTGGTCAATGGGCGC<br>GAGCCTGAACCAGCCAAGTAGCGTGCAGGAT<br>GACGGCCCTATGGGTTGTAACTGCTTTTGTAT<br>GGGGATAAAGTTAGGGACGTGTCCCTATTTGC<br>AGGTACCATACGAATAAGGACCGGCTAATTCC<br>GTGCCAGCAGCCGCGTAATACGGAAGGTCC                                                                     |   |   |   |   |   |   |   |   |   |   |   |         |    |    |   |         |   |   |    |   |    |
| ASV96 | 4 | AGGCGTTATCCGATTTATTGGGTTTAAAGGG<br>ACCGTAGGCTGGAGATTAAGTGTGTTGTGAAA<br>TGTAGACGCTCAACGTCTGAATTGCAGCGCAT<br>ACTGGTTTCCTTGAGTACGCACAACGTTGGCG<br>GAATTCGTCGTGTAGCGGTGAAATGCTTAGAT<br>ATGACGAAGAACTCCGATTGCGAAGGCAGCT<br>GACGGGAGCGCAACTGACGCTTAAGCTCGAA<br>GGTGCGGTATCAAACAGGATTAGATAC | 0 | 0 | 0 | 0 | 0 | 0 | 0 | 0 | 0 | 0 | 0 | 12<br>9 | 0  | 0  | 0 | 38<br>0 | 0 | 0 | 26 | 0 | 38 |
| ASV96 | 7 | GCTGCAGTGGGGAATATTGCACAATGGGGGA<br>AACCCTGATGCAGCGACGCCGCGTGAGTGAA<br>GAAGTATTTCCGTATGTAAAGCTCTATCAGCA<br>GGGAAGAAAATGACGGTACCTGAGTAAGAAG<br>CCCCGGCTAACTACGTGCCAGCAGCCGCGGTA<br>ATACGTAGGGGGCAAGCGTTATCCGATTTAC                                                                     | 0 | 0 | 0 | 0 | 0 | 0 | 0 | 0 | 0 | 0 | 0 | 23<br>4 | 54 | 79 | 0 | 0       | 0 | 0 | 79 | 0 | 0  |

|  |                                                                                                                                                                                                                                                                      |  |  |  |  |  |  |  |  |  |  |  |  |  |  |  |  |  |  |  |  |  |  |  |  |  |  |  |  |  |  |  |  |  |  |  |  |  |  |  |  |  |  |  |  |  |  |  |  |  |  |  |  |  |  |  |  |  |  |  |  |  |  |  |  |  |  |  |  |  |  |  |  |  |  |  |  |  |  |  |  |  |  |  |  |  |  |  |  |  |  |  |  |  |  |  |  |  |  |  |  |  |  |  |  |  |  |  |  |  |  |  |  |  |  |  |  |  |  |  |  |  |  |  |  |  |  |  |  |  |  |  |  |  |  |  |  |  |  |  |  |  |  |  |  |  |  |  |  |  |  |  |  |  |  |  |  |  |  |  |  |  |  |  |  |  |  |  |  |  |  |  |  |  |  |  |  |  |  |  |  |  |  |  |  |  |  |  |  |  |  |  |  |  |  |  |  |  |  |  |  |  |  |  |  |  |  |  |  |  |  |  |  |  |  |  |  |  |  |  |  |  |  |  |  |  |  |  |  |  |  |  |  |  |  |  |  |  |  |  |  |  |  |  |  |  |  |  |  |  |  |  |  |  |  |  |  |  |  |  |  |  |  |  |  |  |  |  |  |  |  |  |  |  |  |  |  |  |  |  |  |  |  |  |  |  |  |  |  |  |  |  |  |  |  |  |  |  |  |  |  |  |  |  |  |  |  |  |  |  |  |  |  |  |  |  |  |  |  |  |  |  |  |  |  |  |  |  |  |  |  |  |  |  |  |  |  |  |  |  |  |  |  |  |  |  |  |  |  |  |  |  |  |  |  |  |  |  |  |  |  |  |  |  |  |  |  |  |  |  |  |  |  |  |  |  |  |  |  |  |  |  |  |  |  |  |  |  |  |  |  |  |  |  |  |  |  |  |  |  |  |  |  |  |  |  |  |  |  |  |  |  |  |  |  |  |  |  |  |  |  |  |  |  |  |  |  |  |  |  |  |  |  |  |  |  |  |  |  |  |  |  |  |  |  |  |  |  |  |  |  |  |  |  |  |  |  |  |  |  |  |  |  |  |  |  |  |  |  |  |  |  |  |  |  |  |  |  |  |  |  |  |  |  |  |  |  |  |  |  |  |  |  |  |  |  |  |  |  |  |  |  |  |  |  |  |  |  |  |  |  |  |  |  |  |  |  |  |  |  |  |  |  |  |  |  |  |  |  |  |  |  |  |  |  |  |  |  |  |  |  |  |  |  |  |  |  |  |  |  |  |  |  |  |  |  |  |  |  |  |  |  |  |  |  |  |  |  |  |  |  |  |  |  |  |  |  |  |  |  |  |  |  |  |  |  |  |  |  |  |  |  |  |  |  |  |  |  |  |  |  |  |  |  |  |  |  |  |  |  |  |  |  |  |  |  |  |  |  |  |  |  |  |  |  |  |  |  |  |  |  |  |  |  |  |  |  |  |  |  |  |  |  |  |  |  |  |  |  |  |  |  |  |  |  |  |  |  |  |  |  |  |  |  |  |  |  |  |  |  |  |  |  |  |  |  |  |  |  |  |  |  |  |  |  |  |  |  |  |  |  |  |  |  |  |  |  |  |  |  |  |  |  |  |  |  |  |  |  |  |  |  |  |  |  |  |  |  |  |  |  |  |  |  |  |  |  |  |  |  |  |  |  |  |  |  |  |  |  |  |  |  |  |  |  |  |  |  |  |  |  |  |  |  |  |  |  |  |  |  |  |  |  |  |  |  |  |  |  |  |  |  |  |  |  |  |  |  |  |  |  |  |  |  |  |  |  |  |  |  |  |  |  |  |  |  |  |  |  |  |  |  |  |  |  |  |  |  |  |  |  |  |  |  |  |  |  |  |  |  |  |  |  |  |  |  |  |  |  |  |  |  |  |  |  |  |  |  |  |  |  |  |  |  |  |  |  |  |  |  |  |  |  |  |  |  |  |  |  |  |  |  |  |  |  |  |  |  |  |  |  |  |  |  |  |  |  |  |  |  |  |  |  |  |  |  |  |  |  |  |  |  |  |  |  |  |  |  |  |  |  |  |  |  |  |  |  |  |  |  |  |  |  |  |  |  |  |  |  |  |  |  |  |  |  |  |  |  |  |  |  |  |  |  |  |  |  |  |  |  |  |  |  |  |  |  |  |  |  |  |  |  |  |  |  |  |  |  |  |  |  |  |  |  |  |  |  |  |  |  |  |  |  |  |  |  |  |  |  |  |  |  |  |  |  |  |  |  |  |  |  |  |  |  |  |  |  |  |  |  |  |  |  |  |  |  |  |  |  |  |  |  |  |  |  |  |  |  |  |  |  |  |  |  |  |  |  |  |  |  |  |  |  |  |  |  |  |  |  |  |  |  |  |  |  |  |  |  |  |  |  |  |  |  |  |  |  |  |  |  |  |  |  |  |  |  |  |  |  |  |  |  |  |  |  |  |  |  |  |  |  |  |  |  |  |  |  |  |  |  |  |  |  |  |  |  |  |  |  |  |  |  |  |  |  |  |  |  |  |  |  |  |  |  |  |  |  |  |  |  |  |  |  |  |  |  |  |  |  |  |  |  |  |  |  |  |  |  |  |  |  |  |  |  |  |  |  |  |  |  |  |  |  |  |  |  |  |  |  |  |  |  |  |  |  |  |  |  |  |  |  |  |  |  |  |  |  |  |  |  |  |  |  |  |  |  |  |  |  |  |  |  |  |  |  |  |  |  |  |  |  |  |  |  |  |  |  |  |  |  |  |  |  |  |  |  |  |  |  |  |  |  |  |  |  |  |  |  |  |  |  |  |  |  |  |  |  |  |  |  |  |  |  |  |  |  |  |  |  |  |  |  |  |  |  |  |  |  |  |  |  |  |  |  |  |  |  |  |  |  |  |  |  |  |  |  |  |  |  |  |  |  |  |  |  |  |  |  |  |  |  |  |  |  |  |  |  |  |  |  |  |  |  |  |  |  |  |  |  |  |  |  |  |  |  |  |  |  |  |  |  |  |  |  |  |  |  |  |  |  |  |  |  |  |  |  |  |  |  |  |  |  |  |  |  |  |  |  |  |  |  |  |  |  |  |  |  |  |  |  |  |  |  |  |  |  |  |  |  |  |  |  |  |  |  |  |  |  |  |  |  |  |  |  |  |  |  |  |  |  |  |  |  |  |  |  |  |  |  |  |  |  |  |  |  |  |  |  |  |  |  |  |  |  |  |  |  |  |  |  |  |  |  |  |  |  |  |  |  |  |  |  |  |  |  |  |  |  |  |  |  |  |  |  |  |  |  |  |  |  |  |  |  |  |  |  |  |  |  |  |  |  |  |  |  |  |  |  |  |  |  |  |  |  |  |  |  |  |  |  |  |  |  |  |  |  |  |  |  |  |  |    |
|--|----------------------------------------------------------------------------------------------------------------------------------------------------------------------------------------------------------------------------------------------------------------------|--|--|--|--|--|--|--|--|--|--|--|--|--|--|--|--|--|--|--|--|--|--|--|--|--|--|--|--|--|--|--|--|--|--|--|--|--|--|--|--|--|--|--|--|--|--|--|--|--|--|--|--|--|--|--|--|--|--|--|--|--|--|--|--|--|--|--|--|--|--|--|--|--|--|--|--|--|--|--|--|--|--|--|--|--|--|--|--|--|--|--|--|--|--|--|--|--|--|--|--|--|--|--|--|--|--|--|--|--|--|--|--|--|--|--|--|--|--|--|--|--|--|--|--|--|--|--|--|--|--|--|--|--|--|--|--|--|--|--|--|--|--|--|--|--|--|--|--|--|--|--|--|--|--|--|--|--|--|--|--|--|--|--|--|--|--|--|--|--|--|--|--|--|--|--|--|--|--|--|--|--|--|--|--|--|--|--|--|--|--|--|--|--|--|--|--|--|--|--|--|--|--|--|--|--|--|--|--|--|--|--|--|--|--|--|--|--|--|--|--|--|--|--|--|--|--|--|--|--|--|--|--|--|--|--|--|--|--|--|--|--|--|--|--|--|--|--|--|--|--|--|--|--|--|--|--|--|--|--|--|--|--|--|--|--|--|--|--|--|--|--|--|--|--|--|--|--|--|--|--|--|--|--|--|--|--|--|--|--|--|--|--|--|--|--|--|--|--|--|--|--|--|--|--|--|--|--|--|--|--|--|--|--|--|--|--|--|--|--|--|--|--|--|--|--|--|--|--|--|--|--|--|--|--|--|--|--|--|--|--|--|--|--|--|--|--|--|--|--|--|--|--|--|--|--|--|--|--|--|--|--|--|--|--|--|--|--|--|--|--|--|--|--|--|--|--|--|--|--|--|--|--|--|--|--|--|--|--|--|--|--|--|--|--|--|--|--|--|--|--|--|--|--|--|--|--|--|--|--|--|--|--|--|--|--|--|--|--|--|--|--|--|--|--|--|--|--|--|--|--|--|--|--|--|--|--|--|--|--|--|--|--|--|--|--|--|--|--|--|--|--|--|--|--|--|--|--|--|--|--|--|--|--|--|--|--|--|--|--|--|--|--|--|--|--|--|--|--|--|--|--|--|--|--|--|--|--|--|--|--|--|--|--|--|--|--|--|--|--|--|--|--|--|--|--|--|--|--|--|--|--|--|--|--|--|--|--|--|--|--|--|--|--|--|--|--|--|--|--|--|--|--|--|--|--|--|--|--|--|--|--|--|--|--|--|--|--|--|--|--|--|--|--|--|--|--|--|--|--|--|--|--|--|--|--|--|--|--|--|--|--|--|--|--|--|--|--|--|--|--|--|--|--|--|--|--|--|--|--|--|--|--|--|--|--|--|--|--|--|--|--|--|--|--|--|--|--|--|--|--|--|--|--|--|--|--|--|--|--|--|--|--|--|--|--|--|--|--|--|--|--|--|--|--|--|--|--|--|--|--|--|--|--|--|--|--|--|--|--|--|--|--|--|--|--|--|--|--|--|--|--|--|--|--|--|--|--|--|--|--|--|--|--|--|--|--|--|--|--|--|--|--|--|--|--|--|--|--|--|--|--|--|--|--|--|--|--|--|--|--|--|--|--|--|--|--|--|--|--|--|--|--|--|--|--|--|--|--|--|--|--|--|--|--|--|--|--|--|--|--|--|--|--|--|--|--|--|--|--|--|--|--|--|--|--|--|--|--|--|--|--|--|--|--|--|--|--|--|--|--|--|--|--|--|--|--|--|--|--|--|--|--|--|--|--|--|--|--|--|--|--|--|--|--|--|--|--|--|--|--|--|--|--|--|--|--|--|--|--|--|--|--|--|--|--|--|--|--|--|--|--|--|--|--|--|--|--|--|--|--|--|--|--|--|--|--|--|--|--|--|--|--|--|--|--|--|--|--|--|--|--|--|--|--|--|--|--|--|--|--|--|--|--|--|--|--|--|--|--|--|--|--|--|--|--|--|--|--|--|--|--|--|--|--|--|--|--|--|--|--|--|--|--|--|--|--|--|--|--|--|--|--|--|--|--|--|--|--|--|--|--|--|--|--|--|--|--|--|--|--|--|--|--|--|--|--|--|--|--|--|--|--|--|--|--|--|--|--|--|--|--|--|--|--|--|--|--|--|--|--|--|--|--|--|--|--|--|--|--|--|--|--|--|--|--|--|--|--|--|--|--|--|--|--|--|--|--|--|--|--|--|--|--|--|--|--|--|--|--|--|--|--|--|--|--|--|--|--|--|--|--|--|--|--|--|--|--|--|--|--|--|--|--|--|--|--|--|--|--|--|--|--|--|--|--|--|--|--|--|--|--|--|--|--|--|--|--|--|--|--|--|--|--|--|--|--|--|--|--|--|--|--|--|--|--|--|--|--|--|--|--|--|--|--|--|--|--|--|--|--|--|--|--|--|--|--|--|--|--|--|--|--|--|--|--|--|--|--|--|--|--|--|--|--|--|--|--|--|--|--|--|--|--|--|--|--|--|--|--|--|--|--|--|--|--|--|--|--|--|--|--|--|--|--|--|--|--|--|--|--|--|--|--|--|--|--|--|--|--|--|--|--|--|--|--|--|--|--|--|--|--|--|--|--|--|--|--|--|--|--|--|--|--|--|--|--|--|--|--|--|--|--|--|--|--|--|--|--|--|--|--|--|--|--|--|--|--|--|--|--|--|--|--|--|--|--|--|--|--|--|--|--|--|--|--|--|--|--|--|--|--|--|--|--|--|--|--|--|--|--|--|--|--|--|--|--|--|--|--|--|--|--|--|--|--|--|--|--|--|--|--|--|--|--|--|--|--|--|--|--|--|--|--|--|--|--|--|--|--|--|--|--|--|--|--|--|--|--|--|--|--|--|--|--|--|--|--|--|--|--|--|--|--|--|--|--|--|--|--|--|--|--|--|--|--|--|--|--|--|--|--|--|--|--|--|--|--|--|--|--|--|--|--|--|--|--|--|--|--|--|--|--|--|--|--|--|--|--|--|--|--|--|--|--|--|--|--|--|--|--|--|--|--|--|--|--|--|--|--|--|--|--|--|--|--|--|--|--|--|--|--|--|--|--|--|--|--|--|--|--|--|--|--|--|--|--|--|--|--|--|--|--|--|--|--|--|--|--|--|--|--|--|--|--|--|--|--|--|--|--|--|--|--|--|--|--|--|--|--|--|--|--|--|--|--|--|--|--|--|--|--|--|--|--|--|--|--|--|--|--|--|--|--|--|--|--|--|--|--|--|--|--|--|--|--|--|--|--|--|--|--|--|--|--|--|--|--|--|--|--|--|--|--|--|--|--|--|--|--|--|--|--|--|--|--|--|--|--|--|--|--|--|--|--|--|--|--|--|--|--|--|--|--|--|--|--|--|--|--|--|----|
|  | TGGGTGTAAAGGGAGCGCAGACGGCTCTGCA<br>AGTCTGAAGTGAAAGCCCCGCGGCTTAACCGCG<br>GGACTGCTTTGGAAACTGCAAGGCTTGAGTAT<br>CGGAGGGGCAGGCGGAATTCCTAGTGTAGCG<br>GTGAAATGCGTAGATATTAGGAAGAACACCG<br>GTGGCGAAGGCGGCCTGCTGGACGAAAACTG<br>ACGTTGAGGCTCGAAGGCGTGGGGAGCAAAC<br>AGGATTAGATAC |  |  |  |  |  |  |  |  |  |  |  |  |  |  |  |  |  |  |  |  |  |  |  |  |  |  |  |  |  |  |  |  |  |  |  |  |  |  |  |  |  |  |  |  |  |  |  |  |  |  |  |  |  |  |  |  |  |  |  |  |  |  |  |  |  |  |  |  |  |  |  |  |  |  |  |  |  |  |  |  |  |  |  |  |  |  |  |  |  |  |  |  |  |  |  |  |  |  |  |  |  |  |  |  |  |  |  |  |  |  |  |  |  |  |  |  |  |  |  |  |  |  |  |  |  |  |  |  |  |  |  |  |  |  |  |  |  |  |  |  |  |  |  |  |  |  |  |  |  |  |  |  |  |  |  |  |  |  |  |  |  |  |  |  |  |  |  |  |  |  |  |  |  |  |  |  |  |  |  |  |  |  |  |  |  |  |  |  |  |  |  |  |  |  |  |  |  |  |  |  |  |  |  |  |  |  |  |  |  |  |  |  |  |  |  |  |  |  |  |  |  |  |  |  |  |  |  |  |  |  |  |  |  |  |  |  |  |  |  |  |  |  |  |  |  |  |  |  |  |  |  |  |  |  |  |  |  |  |  |  |  |  |  |  |  |  |  |  |  |  |  |  |  |  |  |  |  |  |  |  |  |  |  |  |  |  |  |  |  |  |  |  |  |  |  |  |  |  |  |  |  |  |  |  |  |  |  |  |  |  |  |  |  |  |  |  |  |  |  |  |  |  |  |  |  |  |  |  |  |  |  |  |  |  |  |  |  |  |  |  |  |  |  |  |  |  |  |  |  |  |  |  |  |  |  |  |  |  |  |  |  |  |  |  |  |  |  |  |  |  |  |  |  |  |  |  |  |  |  |  |  |  |  |  |  |  |  |  |  |  |  |  |  |  |  |  |  |  |  |  |  |  |  |  |  |  |  |  |  |  |  |  |  |  |  |  |  |  |  |  |  |  |  |  |  |  |  |  |  |  |  |  |  |  |  |  |  |  |  |  |  |  |  |  |  |  |  |  |  |  |  |  |  |  |  |  |  |  |  |  |  |  |  |  |  |  |  |  |  |  |  |  |  |  |  |  |  |  |  |  |  |  |  |  |  |  |  |  |  |  |  |  |  |  |  |  |  |  |  |  |  |  |  |  |  |  |  |  |  |  |  |  |  |  |  |  |  |  |  |  |  |  |  |  |  |  |  |  |  |  |  |  |  |  |  |  |  |  |  |  |  |  |  |  |  |  |  |  |  |  |  |  |  |  |  |  |  |  |  |  |  |  |  |  |  |  |  |  |  |  |  |  |  |  |  |  |  |  |  |  |  |  |  |  |  |  |  |  |  |  |  |  |  |  |  |  |  |  |  |  |  |  |  |  |  |  |  |  |  |  |  |  |  |  |  |  |  |  |  |  |  |  |  |  |  |  |  |  |  |  |  |  |  |  |  |  |  |  |  |  |  |  |  |  |  |  |  |  |  |  |  |  |  |  |  |  |  |  |  |  |  |  |  |  |  |  |  |  |  |  |  |  |  |  |  |  |  |  |  |  |  |  |  |  |  |  |  |  |  |  |  |  |  |  |  |  |  |  |  |  |  |  |  |  |  |  |  |  |  |  |  |  |  |  |  |  |  |  |  |  |  |  |  |  |  |  |  |  |  |  |  |  |  |  |  |  |  |  |  |  |  |  |  |  |  |  |  |  |  |  |  |  |  |  |  |  |  |  |  |  |  |  |  |  |  |  |  |  |  |  |  |  |  |  |  |  |  |  |  |  |  |  |  |  |  |  |  |  |  |  |  |  |  |  |  |  |  |  |  |  |  |  |  |  |  |  |  |  |  |  |  |  |  |  |  |  |  |  |  |  |  |  |  |  |  |  |  |  |  |  |  |  |  |  |  |  |  |  |  |  |  |  |  |  |  |  |  |  |  |  |  |  |  |  |  |  |  |  |  |  |  |  |  |  |  |  |  |  |  |  |  |  |  |  |  |  |  |  |  |  |  |  |  |  |  |  |  |  |  |  |  |  |  |  |  |  |  |  |  |  |  |  |  |  |  |  |  |  |  |  |  |  |  |  |  |  |  |  |  |  |  |  |  |  |  |  |  |  |  |  |  |  |  |  |  |  |  |  |  |  |  |  |  |  |  |  |  |  |  |  |  |  |  |  |  |  |  |  |  |  |  |  |  |  |  |  |  |  |  |  |  |  |  |  |  |  |  |  |  |  |  |  |  |  |  |  |  |  |  |  |  |  |  |  |  |  |  |  |  |  |  |  |  |  |  |  |  |  |  |  |  |  |  |  |  |  |  |  |  |  |  |  |  |  |  |  |  |  |  |  |  |  |  |  |  |  |  |  |  |  |  |  |  |  |  |  |  |  |  |  |  |  |  |  |  |  |  |  |  |  |  |  |  |  |  |  |  |  |  |  |  |  |  |  |  |  |  |  |  |  |  |  |  |  |  |  |  |  |  |  |  |  |  |  |  |  |  |  |  |  |  |  |  |  |  |  |  |  |  |  |  |  |  |  |  |  |  |  |  |  |  |  |  |  |  |  |  |  |  |  |  |  |  |  |  |  |  |  |  |  |  |  |  |  |  |  |  |  |  |  |  |  |  |  |  |  |  |  |  |  |  |  |  |  |  |  |  |  |  |  |  |  |  |  |  |  |  |  |  |  |  |  |  |  |  |  |  |  |  |  |  |  |  |  |  |  |  |  |  |  |  |  |  |  |  |  |  |  |  |  |  |  |  |  |  |  |  |  |  |  |  |  |  |  |  |  |  |  |  |  |  |  |  |  |  |  |  |  |  |  |  |  |  |  |  |  |  |  |  |  |  |  |  |  |  |  |  |  |  |  |  |  |  |  |  |  |  |  |  |  |  |  |  |  |  |  |  |  |  |  |  |  |  |  |  |  |  |  |  |  |  |  |  |  |  |  |  |  |  |  |  |  |  |  |  |  |  |  |  |  |  |  |  |  |  |  |  |  |  |  |  |  |  |  |  |  |  |  |  |  |  |  |  |  |  |  |  |  |  |  |  |  |  |  |  |  |  |  |  |  |  |  |  |  |  |  |  |  |  |  |  |  |  |  |  |  |  |  |  |  |  |  |  |  |  |  |  |  |  |  |  |  |  |  |  |  |  |  |  |  |  |  |  |  |  |  |  |  |  |  |  |  |  |  |  |  |  |  |  |  |  |  |  |  |  |  |  |  |  |  |  |  |  |  |  |  |  |  |  |  |  |  |  |  |  |  |  |  |  |  |  |  |  |  |  |  |  |  |  |  |  |  |  |  |  |  |  |  |  |  |  |  |  |  |  |  |  |  |  |  |  |  |  |  |  |  |  |  |  |  |  |  |  |  |  |  |  |  |  |  | </ |
|--|----------------------------------------------------------------------------------------------------------------------------------------------------------------------------------------------------------------------------------------------------------------------|--|--|--|--|--|--|--|--|--|--|--|--|--|--|--|--|--|--|--|--|--|--|--|--|--|--|--|--|--|--|--|--|--|--|--|--|--|--|--|--|--|--|--|--|--|--|--|--|--|--|--|--|--|--|--|--|--|--|--|--|--|--|--|--|--|--|--|--|--|--|--|--|--|--|--|--|--|--|--|--|--|--|--|--|--|--|--|--|--|--|--|--|--|--|--|--|--|--|--|--|--|--|--|--|--|--|--|--|--|--|--|--|--|--|--|--|--|--|--|--|--|--|--|--|--|--|--|--|--|--|--|--|--|--|--|--|--|--|--|--|--|--|--|--|--|--|--|--|--|--|--|--|--|--|--|--|--|--|--|--|--|--|--|--|--|--|--|--|--|--|--|--|--|--|--|--|--|--|--|--|--|--|--|--|--|--|--|--|--|--|--|--|--|--|--|--|--|--|--|--|--|--|--|--|--|--|--|--|--|--|--|--|--|--|--|--|--|--|--|--|--|--|--|--|--|--|--|--|--|--|--|--|--|--|--|--|--|--|--|--|--|--|--|--|--|--|--|--|--|--|--|--|--|--|--|--|--|--|--|--|--|--|--|--|--|--|--|--|--|--|--|--|--|--|--|--|--|--|--|--|--|--|--|--|--|--|--|--|--|--|--|--|--|--|--|--|--|--|--|--|--|--|--|--|--|--|--|--|--|--|--|--|--|--|--|--|--|--|--|--|--|--|--|--|--|--|--|--|--|--|--|--|--|--|--|--|--|--|--|--|--|--|--|--|--|--|--|--|--|--|--|--|--|--|--|--|--|--|--|--|--|--|--|--|--|--|--|--|--|--|--|--|--|--|--|--|--|--|--|--|--|--|--|--|--|--|--|--|--|--|--|--|--|--|--|--|--|--|--|--|--|--|--|--|--|--|--|--|--|--|--|--|--|--|--|--|--|--|--|--|--|--|--|--|--|--|--|--|--|--|--|--|--|--|--|--|--|--|--|--|--|--|--|--|--|--|--|--|--|--|--|--|--|--|--|--|--|--|--|--|--|--|--|--|--|--|--|--|--|--|--|--|--|--|--|--|--|--|--|--|--|--|--|--|--|--|--|--|--|--|--|--|--|--|--|--|--|--|--|--|--|--|--|--|--|--|--|--|--|--|--|--|--|--|--|--|--|--|--|--|--|--|--|--|--|--|--|--|--|--|--|--|--|--|--|--|--|--|--|--|--|--|--|--|--|--|--|--|--|--|--|--|--|--|--|--|--|--|--|--|--|--|--|--|--|--|--|--|--|--|--|--|--|--|--|--|--|--|--|--|--|--|--|--|--|--|--|--|--|--|--|--|--|--|--|--|--|--|--|--|--|--|--|--|--|--|--|--|--|--|--|--|--|--|--|--|--|--|--|--|--|--|--|--|--|--|--|--|--|--|--|--|--|--|--|--|--|--|--|--|--|--|--|--|--|--|--|--|--|--|--|--|--|--|--|--|--|--|--|--|--|--|--|--|--|--|--|--|--|--|--|--|--|--|--|--|--|--|--|--|--|--|--|--|--|--|--|--|--|--|--|--|--|--|--|--|--|--|--|--|--|--|--|--|--|--|--|--|--|--|--|--|--|--|--|--|--|--|--|--|--|--|--|--|--|--|--|--|--|--|--|--|--|--|--|--|--|--|--|--|--|--|--|--|--|--|--|--|--|--|--|--|--|--|--|--|--|--|--|--|--|--|--|--|--|--|--|--|--|--|--|--|--|--|--|--|--|--|--|--|--|--|--|--|--|--|--|--|--|--|--|--|--|--|--|--|--|--|--|--|--|--|--|--|--|--|--|--|--|--|--|--|--|--|--|--|--|--|--|--|--|--|--|--|--|--|--|--|--|--|--|--|--|--|--|--|--|--|--|--|--|--|--|--|--|--|--|--|--|--|--|--|--|--|--|--|--|--|--|--|--|--|--|--|--|--|--|--|--|--|--|--|--|--|--|--|--|--|--|--|--|--|--|--|--|--|--|--|--|--|--|--|--|--|--|--|--|--|--|--|--|--|--|--|--|--|--|--|--|--|--|--|--|--|--|--|--|--|--|--|--|--|--|--|--|--|--|--|--|--|--|--|--|--|--|--|--|--|--|--|--|--|--|--|--|--|--|--|--|--|--|--|--|--|--|--|--|--|--|--|--|--|--|--|--|--|--|--|--|--|--|--|--|--|--|--|--|--|--|--|--|--|--|--|--|--|--|--|--|--|--|--|--|--|--|--|--|--|--|--|--|--|--|--|--|--|--|--|--|--|--|--|--|--|--|--|--|--|--|--|--|--|--|--|--|--|--|--|--|--|--|--|--|--|--|--|--|--|--|--|--|--|--|--|--|--|--|--|--|--|--|--|--|--|--|--|--|--|--|--|--|--|--|--|--|--|--|--|--|--|--|--|--|--|--|--|--|--|--|--|--|--|--|--|--|--|--|--|--|--|--|--|--|--|--|--|--|--|--|--|--|--|--|--|--|--|--|--|--|--|--|--|--|--|--|--|--|--|--|--|--|--|--|--|--|--|--|--|--|--|--|--|--|--|--|--|--|--|--|--|--|--|--|--|--|--|--|--|--|--|--|--|--|--|--|--|--|--|--|--|--|--|--|--|--|--|--|--|--|--|--|--|--|--|--|--|--|--|--|--|--|--|--|--|--|--|--|--|--|--|--|--|--|--|--|--|--|--|--|--|--|--|--|--|--|--|--|--|--|--|--|--|--|--|--|--|--|--|--|--|--|--|--|--|--|--|--|--|--|--|--|--|--|--|--|--|--|--|--|--|--|--|--|--|--|--|--|--|--|--|--|--|--|--|--|--|--|--|--|--|--|--|--|--|--|--|--|--|--|--|--|--|--|--|--|--|--|--|--|--|--|--|--|--|--|--|--|--|--|--|--|--|--|--|--|--|--|--|--|--|--|--|--|--|--|--|--|--|--|--|--|--|--|--|--|--|--|--|--|--|--|--|--|--|--|--|--|--|--|--|--|--|--|--|--|--|--|--|--|--|--|--|--|--|--|--|--|--|--|--|--|--|--|--|--|--|--|--|--|--|--|--|--|--|--|--|--|--|--|--|--|--|--|--|--|--|--|--|--|--|--|--|--|--|--|--|--|--|--|--|--|--|--|--|--|--|--|--|--|--|--|--|--|--|--|--|--|--|--|--|--|--|--|--|--|--|--|--|--|--|--|--|--|--|--|--|--|--|--|--|--|--|--|--|--|--|--|--|--|--|--|--|--|--|--|--|--|--|--|--|--|--|--|--|--|--|--|--|--|--|--|--|--|--|--|--|--|--|--|--|--|--|--|--|--|--|--|--|--|--|--|--|--|--|--|--|--|--|--|--|----|

|  |                                                                                                                                                                                                                                                                                                         |  |  |  |  |  |  |  |  |  |  |  |  |  |  |  |  |  |  |  |  |  |  |  |  |  |  |  |  |  |  |  |  |  |  |  |  |  |  |  |  |  |  |  |  |  |  |  |  |  |  |  |  |  |  |  |  |  |  |  |  |  |  |  |  |  |  |  |  |  |  |  |  |  |  |  |  |  |  |  |  |  |  |  |  |  |  |  |  |  |  |  |  |  |  |  |  |  |  |  |  |  |  |  |  |  |  |  |  |  |  |  |  |  |  |  |  |  |  |  |  |  |  |  |  |  |  |  |  |  |  |  |  |  |  |  |  |  |  |  |  |  |  |  |  |  |  |  |  |  |  |  |  |  |  |  |  |  |  |  |  |  |  |  |  |  |  |  |  |  |  |  |  |  |  |  |  |  |  |  |  |  |  |  |  |  |  |  |  |  |  |  |  |  |  |  |  |  |  |  |  |  |  |  |  |  |  |  |  |  |  |  |  |  |  |  |  |  |  |  |  |  |  |  |  |  |  |  |  |  |  |  |  |  |  |  |  |  |  |  |  |  |  |  |  |  |  |  |  |  |  |  |  |  |  |  |  |  |  |  |  |  |  |  |  |  |  |  |  |  |  |  |  |  |  |  |  |  |  |  |  |  |  |  |  |  |  |  |  |  |  |  |  |  |  |  |  |  |  |  |  |  |  |  |  |  |  |  |  |  |  |  |  |  |  |  |  |  |  |  |  |  |  |  |  |  |  |  |  |  |  |  |  |  |  |  |  |  |  |  |  |  |  |  |  |  |  |  |  |  |  |  |  |  |  |  |  |  |  |  |  |  |  |  |  |  |  |  |  |  |  |  |  |  |  |  |  |  |  |  |  |  |  |  |  |  |  |  |  |  |  |  |  |  |  |  |  |  |  |  |  |  |  |  |  |  |  |  |  |  |  |  |  |  |  |  |  |  |  |  |  |  |  |  |  |  |  |  |  |  |  |  |  |  |  |  |  |  |  |  |  |  |  |  |  |  |  |  |  |  |  |  |  |  |  |  |  |  |  |  |  |  |  |  |  |  |  |  |  |  |  |  |  |  |  |  |  |  |  |  |  |  |  |  |  |  |  |  |  |  |  |  |  |  |  |  |  |  |  |  |  |  |  |  |  |  |  |  |  |  |  |  |  |  |  |  |  |  |  |  |  |  |  |  |  |  |  |  |  |  |  |  |  |  |  |  |  |  |  |  |  |  |  |  |  |  |  |  |  |  |  |  |  |  |  |  |  |  |  |  |  |  |  |  |  |  |  |  |  |  |  |  |  |  |  |  |  |  |  |  |  |  |  |  |  |  |  |  |  |  |  |  |  |  |  |  |  |  |  |  |  |  |  |  |  |  |  |  |  |  |  |  |  |  |  |  |  |  |  |  |  |  |  |  |  |  |  |  |  |  |  |  |  |  |  |  |  |  |  |  |  |  |  |  |  |  |  |  |  |  |  |  |  |  |  |  |  |  |  |  |  |  |  |  |  |  |  |  |  |  |  |  |  |  |  |  |  |  |  |  |  |  |  |  |  |  |  |  |  |  |  |  |  |  |  |  |  |  |  |  |  |  |  |  |  |  |  |  |  |  |  |  |  |  |  |  |  |  |  |  |  |  |  |  |  |  |  |  |  |  |  |  |  |  |  |  |  |  |  |  |  |  |  |  |  |  |  |  |  |  |  |  |  |  |  |  |  |  |  |  |  |  |  |  |  |  |  |  |  |  |  |  |  |  |  |  |  |  |  |  |  |  |  |  |  |  |  |  |  |  |  |  |  |  |  |  |  |  |  |  |  |  |  |  |  |  |  |  |  |  |  |  |  |  |  |  |  |  |  |  |  |  |  |  |  |  |  |  |  |  |  |  |  |  |  |  |  |  |  |  |  |  |  |  |  |  |  |  |  |  |  |  |  |  |  |  |  |  |  |  |  |  |  |  |  |  |  |  |  |  |  |  |  |  |  |  |  |  |  |  |  |  |  |  |  |  |  |  |  |  |  |  |  |  |  |  |  |  |  |  |  |  |  |  |  |  |  |  |  |  |  |  |  |  |  |  |  |  |  |  |  |  |  |  |  |  |  |  |  |  |  |  |  |  |  |  |  |  |  |  |  |  |  |  |  |  |  |  |  |  |  |  |  |  |  |  |  |  |  |  |  |  |  |  |  |  |  |  |  |  |  |  |  |  |  |  |  |  |  |  |  |  |  |  |  |  |  |  |  |  |  |  |  |  |  |  |  |  |  |  |  |  |  |  |  |  |  |  |  |  |  |  |  |  |  |  |  |  |  |  |  |  |  |  |  |  |  |  |  |  |  |  |  |  |  |  |  |  |  |  |  |  |  |  |  |  |  |  |  |  |  |  |  |  |  |  |  |  |  |  |  |  |  |  |  |  |  |  |  |  |  |  |  |  |  |  |  |  |  |  |  |  |  |  |  |  |  |  |  |  |  |  |  |  |  |  |  |  |  |  |  |  |  |  |  |  |  |  |  |  |  |  |  |  |  |  |  |  |  |  |  |  |  |  |  |  |  |  |  |  |  |  |  |  |  |  |  |  |  |  |  |  |  |  |  |  |  |  |  |  |  |  |  |  |  |  |  |  |  |  |  |  |  |  |  |  |  |  |  |  |  |  |  |  |  |  |  |  |  |  |  |  |  |  |  |  |  |  |  |  |  |  |  |  |  |  |  |  |  |  |  |  |  |  |  |  |  |  |  |  |  |  |  |  |  |  |  |  |  |  |  |  |  |  |  |  |  |  |  |  |  |  |  |  |  |  |  |  |  |  |  |  |  |  |  |  |  |  |  |  |  |  |  |  |  |  |  |  |  |  |  |  |  |  |  |  |  |  |  |  |  |  |  |  |  |  |  |  |  |  |  |  |  |  |  |  |  |  |  |  |  |  |  |  |  |  |  |  |  |  |  |  |  |  |  |  |  |  |  |  |  |  |  |  |  |  |  |  |  |  |  |  |  |  |  |  |  |  |  |  |  |  |  |  |  |  |  |  |  |  |  |  |  |  |  |  |  |  |  |  |  |  |  |  |  |  |  |  |  |  |  |  |  |  |  |  |  |  |  |  |  |  |  |  |  |  |  |  |  |  |  |  |  |  |  |  |  |  |  |  |  |  |  |
|--|---------------------------------------------------------------------------------------------------------------------------------------------------------------------------------------------------------------------------------------------------------------------------------------------------------|--|--|--|--|--|--|--|--|--|--|--|--|--|--|--|--|--|--|--|--|--|--|--|--|--|--|--|--|--|--|--|--|--|--|--|--|--|--|--|--|--|--|--|--|--|--|--|--|--|--|--|--|--|--|--|--|--|--|--|--|--|--|--|--|--|--|--|--|--|--|--|--|--|--|--|--|--|--|--|--|--|--|--|--|--|--|--|--|--|--|--|--|--|--|--|--|--|--|--|--|--|--|--|--|--|--|--|--|--|--|--|--|--|--|--|--|--|--|--|--|--|--|--|--|--|--|--|--|--|--|--|--|--|--|--|--|--|--|--|--|--|--|--|--|--|--|--|--|--|--|--|--|--|--|--|--|--|--|--|--|--|--|--|--|--|--|--|--|--|--|--|--|--|--|--|--|--|--|--|--|--|--|--|--|--|--|--|--|--|--|--|--|--|--|--|--|--|--|--|--|--|--|--|--|--|--|--|--|--|--|--|--|--|--|--|--|--|--|--|--|--|--|--|--|--|--|--|--|--|--|--|--|--|--|--|--|--|--|--|--|--|--|--|--|--|--|--|--|--|--|--|--|--|--|--|--|--|--|--|--|--|--|--|--|--|--|--|--|--|--|--|--|--|--|--|--|--|--|--|--|--|--|--|--|--|--|--|--|--|--|--|--|--|--|--|--|--|--|--|--|--|--|--|--|--|--|--|--|--|--|--|--|--|--|--|--|--|--|--|--|--|--|--|--|--|--|--|--|--|--|--|--|--|--|--|--|--|--|--|--|--|--|--|--|--|--|--|--|--|--|--|--|--|--|--|--|--|--|--|--|--|--|--|--|--|--|--|--|--|--|--|--|--|--|--|--|--|--|--|--|--|--|--|--|--|--|--|--|--|--|--|--|--|--|--|--|--|--|--|--|--|--|--|--|--|--|--|--|--|--|--|--|--|--|--|--|--|--|--|--|--|--|--|--|--|--|--|--|--|--|--|--|--|--|--|--|--|--|--|--|--|--|--|--|--|--|--|--|--|--|--|--|--|--|--|--|--|--|--|--|--|--|--|--|--|--|--|--|--|--|--|--|--|--|--|--|--|--|--|--|--|--|--|--|--|--|--|--|--|--|--|--|--|--|--|--|--|--|--|--|--|--|--|--|--|--|--|--|--|--|--|--|--|--|--|--|--|--|--|--|--|--|--|--|--|--|--|--|--|--|--|--|--|--|--|--|--|--|--|--|--|--|--|--|--|--|--|--|--|--|--|--|--|--|--|--|--|--|--|--|--|--|--|--|--|--|--|--|--|--|--|--|--|--|--|--|--|--|--|--|--|--|--|--|--|--|--|--|--|--|--|--|--|--|--|--|--|--|--|--|--|--|--|--|--|--|--|--|--|--|--|--|--|--|--|--|--|--|--|--|--|--|--|--|--|--|--|--|--|--|--|--|--|--|--|--|--|--|--|--|--|--|--|--|--|--|--|--|--|--|--|--|--|--|--|--|--|--|--|--|--|--|--|--|--|--|--|--|--|--|--|--|--|--|--|--|--|--|--|--|--|--|--|--|--|--|--|--|--|--|--|--|--|--|--|--|--|--|--|--|--|--|--|--|--|--|--|--|--|--|--|--|--|--|--|--|--|--|--|--|--|--|--|--|--|--|--|--|--|--|--|--|--|--|--|--|--|--|--|--|--|--|--|--|--|--|--|--|--|--|--|--|--|--|--|--|--|--|--|--|--|--|--|--|--|--|--|--|--|--|--|--|--|--|--|--|--|--|--|--|--|--|--|--|--|--|--|--|--|--|--|--|--|--|--|--|--|--|--|--|--|--|--|--|--|--|--|--|--|--|--|--|--|--|--|--|--|--|--|--|--|--|--|--|--|--|--|--|--|--|--|--|--|--|--|--|--|--|--|--|--|--|--|--|--|--|--|--|--|--|--|--|--|--|--|--|--|--|--|--|--|--|--|--|--|--|--|--|--|--|--|--|--|--|--|--|--|--|--|--|--|--|--|--|--|--|--|--|--|--|--|--|--|--|--|--|--|--|--|--|--|--|--|--|--|--|--|--|--|--|--|--|--|--|--|--|--|--|--|--|--|--|--|--|--|--|--|--|--|--|--|--|--|--|--|--|--|--|--|--|--|--|--|--|--|--|--|--|--|--|--|--|--|--|--|--|--|--|--|--|--|--|--|--|--|--|--|--|--|--|--|--|--|--|--|--|--|--|--|--|--|--|--|--|--|--|--|--|--|--|--|--|--|--|--|--|--|--|--|--|--|--|--|--|--|--|--|--|--|--|--|--|--|--|--|--|--|--|--|--|--|--|--|--|--|--|--|--|--|--|--|--|--|--|--|--|--|--|--|--|--|--|--|--|--|--|--|--|--|--|--|--|--|--|--|--|--|--|--|--|--|--|--|--|--|--|--|--|--|--|--|--|--|--|--|--|--|--|--|--|--|--|--|--|--|--|--|--|--|--|--|--|--|--|--|--|--|--|--|--|--|--|--|--|--|--|--|--|--|--|--|--|--|--|--|--|--|--|--|--|--|--|--|--|--|--|--|--|--|--|--|--|--|--|--|--|--|--|--|--|--|--|--|--|--|--|--|--|--|--|--|--|--|--|--|--|--|--|--|--|--|--|--|--|--|--|--|--|--|--|--|--|--|--|--|--|--|--|--|--|--|--|--|--|--|--|--|--|--|--|--|--|--|--|--|--|--|--|--|--|--|--|--|--|--|--|--|--|--|--|--|--|--|--|--|--|--|--|--|--|--|--|--|--|--|--|--|--|--|--|--|--|--|--|--|--|--|--|--|--|--|--|--|--|--|--|--|--|--|--|--|--|--|--|--|--|--|--|--|--|--|--|--|--|--|--|--|--|--|--|--|--|--|--|--|--|--|--|--|--|--|--|--|--|--|--|--|--|--|--|--|--|--|--|--|--|--|--|--|--|--|--|--|--|--|--|--|--|--|--|--|--|--|--|--|--|--|--|--|--|--|--|--|--|--|--|--|--|--|--|--|--|--|--|--|--|--|--|--|--|--|--|--|--|--|--|--|--|--|--|--|--|--|--|--|--|--|--|--|--|--|--|--|--|--|--|--|--|--|--|--|--|--|--|--|--|--|--|--|--|--|--|--|--|--|--|--|--|--|--|--|--|
|  | ATACGTAGGGGGCAAGCGTTATCCGGATTTAC<br>TGGGTGTAAAGGGAGCGTAGACGGAGTGGCA<br>AGTCTGAAGTGAAAACCCTGGGCTTAACCTGG<br>GGACTGCTTTGGAAACTGTTAATCTAGAGTGTT<br>GGAGAGGTAAGTGGAATTCCTGGTGTAGCGGT<br>GAAATGCGTAGATATCAGGAAGAACACCGGA<br>GGCGAAGGCGGCTTACTGGACAATAACTGAC<br>GTTGAGGCTCGAAAGCGTGGGGATCAAACAG<br>GATTAGATAC |  |  |  |  |  |  |  |  |  |  |  |  |  |  |  |  |  |  |  |  |  |  |  |  |  |  |  |  |  |  |  |  |  |  |  |  |  |  |  |  |  |  |  |  |  |  |  |  |  |  |  |  |  |  |  |  |  |  |  |  |  |  |  |  |  |  |  |  |  |  |  |  |  |  |  |  |  |  |  |  |  |  |  |  |  |  |  |  |  |  |  |  |  |  |  |  |  |  |  |  |  |  |  |  |  |  |  |  |  |  |  |  |  |  |  |  |  |  |  |  |  |  |  |  |  |  |  |  |  |  |  |  |  |  |  |  |  |  |  |  |  |  |  |  |  |  |  |  |  |  |  |  |  |  |  |  |  |  |  |  |  |  |  |  |  |  |  |  |  |  |  |  |  |  |  |  |  |  |  |  |  |  |  |  |  |  |  |  |  |  |  |  |  |  |  |  |  |  |  |  |  |  |  |  |  |  |  |  |  |  |  |  |  |  |  |  |  |  |  |  |  |  |  |  |  |  |  |  |  |  |  |  |  |  |  |  |  |  |  |  |  |  |  |  |  |  |  |  |  |  |  |  |  |  |  |  |  |  |  |  |  |  |  |  |  |  |  |  |  |  |  |  |  |  |  |  |  |  |  |  |  |  |  |  |  |  |  |  |  |  |  |  |  |  |  |  |  |  |  |  |  |  |  |  |  |  |  |  |  |  |  |  |  |  |  |  |  |  |  |  |  |  |  |  |  |  |  |  |  |  |  |  |  |  |  |  |  |  |  |  |  |  |  |  |  |  |  |  |  |  |  |  |  |  |  |  |  |  |  |  |  |  |  |  |  |  |  |  |  |  |  |  |  |  |  |  |  |  |  |  |  |  |  |  |  |  |  |  |  |  |  |  |  |  |  |  |  |  |  |  |  |  |  |  |  |  |  |  |  |  |  |  |  |  |  |  |  |  |  |  |  |  |  |  |  |  |  |  |  |  |  |  |  |  |  |  |  |  |  |  |  |  |  |  |  |  |  |  |  |  |  |  |  |  |  |  |  |  |  |  |  |  |  |  |  |  |  |  |  |  |  |  |  |  |  |  |  |  |  |  |  |  |  |  |  |  |  |  |  |  |  |  |  |  |  |  |  |  |  |  |  |  |  |  |  |  |  |  |  |  |  |  |  |  |  |  |  |  |  |  |  |  |  |  |  |  |  |  |  |  |  |  |  |  |  |  |  |  |  |  |  |  |  |  |  |  |  |  |  |  |  |  |  |  |  |  |  |  |  |  |  |  |  |  |  |  |  |  |  |  |  |  |  |  |  |  |  |  |  |  |  |  |  |  |  |  |  |  |  |  |  |  |  |  |  |  |  |  |  |  |  |  |  |  |  |  |  |  |  |  |  |  |  |  |  |  |  |  |  |  |  |  |  |  |  |  |  |  |  |  |  |  |  |  |  |  |  |  |  |  |  |  |  |  |  |  |  |  |  |  |  |  |  |  |  |  |  |  |  |  |  |  |  |  |  |  |  |  |  |  |  |  |  |  |  |  |  |  |  |  |  |  |  |  |  |  |  |  |  |  |  |  |  |  |  |  |  |  |  |  |  |  |  |  |  |  |  |  |  |  |  |  |  |  |  |  |  |  |  |  |  |  |  |  |  |  |  |  |  |  |  |  |  |  |  |  |  |  |  |  |  |  |  |  |  |  |  |  |  |  |  |  |  |  |  |  |  |  |  |  |  |  |  |  |  |  |  |  |  |  |  |  |  |  |  |  |  |  |  |  |  |  |  |  |  |  |  |  |  |  |  |  |  |  |  |  |  |  |  |  |  |  |  |  |  |  |  |  |  |  |  |  |  |  |  |  |  |  |  |  |  |  |  |  |  |  |  |  |  |  |  |  |  |  |  |  |  |  |  |  |  |  |  |  |  |  |  |  |  |  |  |  |  |  |  |  |  |  |  |  |  |  |  |  |  |  |  |  |  |  |  |  |  |  |  |  |  |  |  |  |  |  |  |  |  |  |  |  |  |  |  |  |  |  |  |  |  |  |  |  |  |  |  |  |  |  |  |  |  |  |  |  |  |  |  |  |  |  |  |  |  |  |  |  |  |  |  |  |  |  |  |  |  |  |  |  |  |  |  |  |  |  |  |  |  |  |  |  |  |  |  |  |  |  |  |  |  |  |  |  |  |  |  |  |  |  |  |  |  |  |  |  |  |  |  |  |  |  |  |  |  |  |  |  |  |  |  |  |  |  |  |  |  |  |  |  |  |  |  |  |  |  |  |  |  |  |  |  |  |  |  |  |  |  |  |  |  |  |  |  |  |  |  |  |  |  |  |  |  |  |  |  |  |  |  |  |  |  |  |  |  |  |  |  |  |  |  |  |  |  |  |  |  |  |  |  |  |  |  |  |  |  |  |  |  |  |  |  |  |  |  |  |  |  |  |  |  |  |  |  |  |  |  |  |  |  |  |  |  |  |  |  |  |  |  |  |  |  |  |  |  |  |  |  |  |  |  |  |  |  |  |  |  |  |  |  |  |  |  |  |  |  |  |  |  |  |  |  |  |  |  |  |  |  |  |  |  |  |  |  |  |  |  |  |  |  |  |  |  |  |  |  |  |  |  |  |  |  |  |  |  |  |  |  |  |  |  |  |  |  |  |  |  |  |  |  |  |  |  |  |  |  |  |  |  |  |  |  |  |  |  |  |  |  |  |  |  |  |  |  |  |  |  |  |  |  |  |  |  |  |  |  |  |  |  |  |  |  |  |  |  |  |  |  |  |  |  |  |  |  |  |  |  |  |  |  |  |  |  |  |  |  |  |  |  |  |  |  |  |  |  |  |  |  |  |  |  |  |  |  |  |  |  |  |  |  |  |  |  |  |  |  |  |  |  |  |  |  |  |  |  |  |  |  |  |  |  |  |  |  |  |  |  |  |  |  |  |  |  |  |  |  |  |  |  |  |  |  |  |  |  |  |  |  |  |  |  |  |  |  |  |  |  |  |  |  |  |  |  |  |  |  |  |  |  |  |  |  |  |  |  |  |  |  |  |  |  |  |  |  |  |  |  |  |  |  |  |  |  |  |  |  |  |  |  |  |  |  |  |  |  |  |  |  |  |  |  |  |  |  |  |  |  |  |  |  |  |  |  |  |  |  |
|--|---------------------------------------------------------------------------------------------------------------------------------------------------------------------------------------------------------------------------------------------------------------------------------------------------------|--|--|--|--|--|--|--|--|--|--|--|--|--|--|--|--|--|--|--|--|--|--|--|--|--|--|--|--|--|--|--|--|--|--|--|--|--|--|--|--|--|--|--|--|--|--|--|--|--|--|--|--|--|--|--|--|--|--|--|--|--|--|--|--|--|--|--|--|--|--|--|--|--|--|--|--|--|--|--|--|--|--|--|--|--|--|--|--|--|--|--|--|--|--|--|--|--|--|--|--|--|--|--|--|--|--|--|--|--|--|--|--|--|--|--|--|--|--|--|--|--|--|--|--|--|--|--|--|--|--|--|--|--|--|--|--|--|--|--|--|--|--|--|--|--|--|--|--|--|--|--|--|--|--|--|--|--|--|--|--|--|--|--|--|--|--|--|--|--|--|--|--|--|--|--|--|--|--|--|--|--|--|--|--|--|--|--|--|--|--|--|--|--|--|--|--|--|--|--|--|--|--|--|--|--|--|--|--|--|--|--|--|--|--|--|--|--|--|--|--|--|--|--|--|--|--|--|--|--|--|--|--|--|--|--|--|--|--|--|--|--|--|--|--|--|--|--|--|--|--|--|--|--|--|--|--|--|--|--|--|--|--|--|--|--|--|--|--|--|--|--|--|--|--|--|--|--|--|--|--|--|--|--|--|--|--|--|--|--|--|--|--|--|--|--|--|--|--|--|--|--|--|--|--|--|--|--|--|--|--|--|--|--|--|--|--|--|--|--|--|--|--|--|--|--|--|--|--|--|--|--|--|--|--|--|--|--|--|--|--|--|--|--|--|--|--|--|--|--|--|--|--|--|--|--|--|--|--|--|--|--|--|--|--|--|--|--|--|--|--|--|--|--|--|--|--|--|--|--|--|--|--|--|--|--|--|--|--|--|--|--|--|--|--|--|--|--|--|--|--|--|--|--|--|--|--|--|--|--|--|--|--|--|--|--|--|--|--|--|--|--|--|--|--|--|--|--|--|--|--|--|--|--|--|--|--|--|--|--|--|--|--|--|--|--|--|--|--|--|--|--|--|--|--|--|--|--|--|--|--|--|--|--|--|--|--|--|--|--|--|--|--|--|--|--|--|--|--|--|--|--|--|--|--|--|--|--|--|--|--|--|--|--|--|--|--|--|--|--|--|--|--|--|--|--|--|--|--|--|--|--|--|--|--|--|--|--|--|--|--|--|--|--|--|--|--|--|--|--|--|--|--|--|--|--|--|--|--|--|--|--|--|--|--|--|--|--|--|--|--|--|--|--|--|--|--|--|--|--|--|--|--|--|--|--|--|--|--|--|--|--|--|--|--|--|--|--|--|--|--|--|--|--|--|--|--|--|--|--|--|--|--|--|--|--|--|--|--|--|--|--|--|--|--|--|--|--|--|--|--|--|--|--|--|--|--|--|--|--|--|--|--|--|--|--|--|--|--|--|--|--|--|--|--|--|--|--|--|--|--|--|--|--|--|--|--|--|--|--|--|--|--|--|--|--|--|--|--|--|--|--|--|--|--|--|--|--|--|--|--|--|--|--|--|--|--|--|--|--|--|--|--|--|--|--|--|--|--|--|--|--|--|--|--|--|--|--|--|--|--|--|--|--|--|--|--|--|--|--|--|--|--|--|--|--|--|--|--|--|--|--|--|--|--|--|--|--|--|--|--|--|--|--|--|--|--|--|--|--|--|--|--|--|--|--|--|--|--|--|--|--|--|--|--|--|--|--|--|--|--|--|--|--|--|--|--|--|--|--|--|--|--|--|--|--|--|--|--|--|--|--|--|--|--|--|--|--|--|--|--|--|--|--|--|--|--|--|--|--|--|--|--|--|--|--|--|--|--|--|--|--|--|--|--|--|--|--|--|--|--|--|--|--|--|--|--|--|--|--|--|--|--|--|--|--|--|--|--|--|--|--|--|--|--|--|--|--|--|--|--|--|--|--|--|--|--|--|--|--|--|--|--|--|--|--|--|--|--|--|--|--|--|--|--|--|--|--|--|--|--|--|--|--|--|--|--|--|--|--|--|--|--|--|--|--|--|--|--|--|--|--|--|--|--|--|--|--|--|--|--|--|--|--|--|--|--|--|--|--|--|--|--|--|--|--|--|--|--|--|--|--|--|--|--|--|--|--|--|--|--|--|--|--|--|--|--|--|--|--|--|--|--|--|--|--|--|--|--|--|--|--|--|--|--|--|--|--|--|--|--|--|--|--|--|--|--|--|--|--|--|--|--|--|--|--|--|--|--|--|--|--|--|--|--|--|--|--|--|--|--|--|--|--|--|--|--|--|--|--|--|--|--|--|--|--|--|--|--|--|--|--|--|--|--|--|--|--|--|--|--|--|--|--|--|--|--|--|--|--|--|--|--|--|--|--|--|--|--|--|--|--|--|--|--|--|--|--|--|--|--|--|--|--|--|--|--|--|--|--|--|--|--|--|--|--|--|--|--|--|--|--|--|--|--|--|--|--|--|--|--|--|--|--|--|--|--|--|--|--|--|--|--|--|--|--|--|--|--|--|--|--|--|--|--|--|--|--|--|--|--|--|--|--|--|--|--|--|--|--|--|--|--|--|--|--|--|--|--|--|--|--|--|--|--|--|--|--|--|--|--|--|--|--|--|--|--|--|--|--|--|--|--|--|--|--|--|--|--|--|--|--|--|--|--|--|--|--|--|--|--|--|--|--|--|--|--|--|--|--|--|--|--|--|--|--|--|--|--|--|--|--|--|--|--|--|--|--|--|--|--|--|--|--|--|--|--|--|--|--|--|--|--|--|--|--|--|--|--|--|--|--|--|--|--|--|--|--|--|--|--|--|--|--|--|--|--|--|--|--|--|--|--|--|--|--|--|--|--|--|--|--|--|--|--|--|--|--|--|--|--|--|--|--|--|--|--|--|--|--|--|--|--|--|--|--|--|--|--|--|--|--|--|--|--|--|--|--|--|--|--|--|--|--|--|--|--|--|--|--|--|--|--|--|--|--|--|--|--|--|--|--|--|--|--|--|--|--|--|--|--|--|--|--|--|--|--|--|--|--|--|--|--|--|--|--|--|--|--|--|--|--|--|--|--|--|--|--|--|--|--|--|--|--|--|--|--|--|--|--|--|--|--|--|--|--|--|--|--|--|--|--|--|--|--|--|--|--|--|--|--|--|--|



GCTGCAGTAGGGAATATTGCGCAATGGGGGA  
AACCCTGACGCAGCAACGCCGCGTGGAGGAT  
GACACTTTTCGGAGCGTAAACTCCTTTTGTTAC  
GGAAGAATAATGACGGTACCTAACGAATAAG  
CACCGGCTAACTCCGTGCCAGCAGCCGCGGTA  
ATACGGAGGGTGCAAGCGTTACTCGGAATCAC  
TGGGCGTAAAGGACGCGTAGGCGGATTATCA  
AGTCTCTTGTAATCTAGTGGCTTAACCACTA  
AACTGCTTGGGAACTGATAATCTAGAGTAAG  
GGAGAGGCAGATGGAATTCTTGGTGTAGGGGT  
AAAATCCGTAGAGATCAAGAAGAATACTTATT  
GCCAAGGCGATCTGCTAGAACTTAAGTACGC  
TAATGCGTGAAAGCGTGGGGAGCAAACAGGA  
TTAGATAC

ASV11  
53[illegible]





GCAGCAGTAGGGAATCTTCGGCAATGGGGGG  
AACCCGTGACCGAGCAACGCCGCGTGAGTGAA  
GAAGGTTTTCGGATCGTAAAGCTCTGTTGTAA  
GAGAAGAACGGGTGTGAGAGTGGAAGTTCA  
CACTGTGACGGTATCTTACCAGAAAGGGACGG  
CTAACTACGTGCCAGCAGCCGCGGTAATACGT  
AGGTCCCGAGCGTTGTCCGATTTATTGGGCG  
TAAAGCGAGCGCAGGCGGTTAGATAAGTCTG  
AAGTTAAAGGCTGTGGCTTAACCATAGTACGC  
TTTGAAACTGTTTAACTTGAGTGCAGAAGGG  
GAGAGTGGAATTCCATGTGTAGCGGTGAAATG  
CGTAGATATATGGAGGAACACCGGTGGCGAA  
AGCGGCTCTCTGGTCTGTAAGTACGCTGAGG  
CTCGAAAGCGTGGGGAGCAAACAGGATTAGA  
TAC

|   |   |   |   |   |   |   |   |   |   |   |   |    |   |   |   |   |   |    |   |   |   |
|---|---|---|---|---|---|---|---|---|---|---|---|----|---|---|---|---|---|----|---|---|---|
| 0 | 0 | 0 | 0 | 0 | 0 | 0 | 0 | 0 | 0 | 0 | 0 | 42 | 0 | 1 | 3 | 7 | 2 | 35 | 2 | 0 | 0 |
|---|---|---|---|---|---|---|---|---|---|---|---|----|---|---|---|---|---|----|---|---|---|

ATGTACCTTCAGAAAAAGGACCGGCTAATTCC  
GTGCCAGCAGCCGCGTAATACGGAAGGTCC  
AGGCGTTATCCGATTTATTGGGTTTAAAGGG  
AGCGTAGGCGGATTGTTAAGTCAGCGGTTAAA  
GGGTGTGGCTCAACCATACATTGCCGTTGAAA  
CTGGCGATCTTGAGTGCAGACAGGGATGCCGG

|   |   |   |   |   |   |   |   |   |   |   |  |   |   |   |           |          |   |   |   |   |   |   |
|---|---|---|---|---|---|---|---|---|---|---|--|---|---|---|-----------|----------|---|---|---|---|---|---|
| 0 | 0 | 0 | 0 | 0 | 0 | 0 | 0 | 0 | 0 | 0 |  | 0 | 0 | 0 | <u>14</u> | <u>4</u> | 0 | 1 | 0 | 0 | 0 | 2 |
|---|---|---|---|---|---|---|---|---|---|---|--|---|---|---|-----------|----------|---|---|---|---|---|---|



AAGTTAAAGGCTGTGGCTTAACCATAGTACGC  
 TTTGGAACTGTTTAACTTGAGTGCAGAAGGG  
 GAGAGTGGAATTCCATGTGTAGCGGTGAAATG  
 CGTAGATATATGGAGGAACACCGGTGGCGAA  
 AGCGGCTCTCTGGTCTGTAAGTACGCTGAGG  
 CTCGAAAGCGTGGGGAGCAAACAGGATTAGA  
 TAC

|             |                                   |   |   |   |   |   |   |   |   |   |   |   |   |   |    |   |   |   |   |    |
|-------------|-----------------------------------|---|---|---|---|---|---|---|---|---|---|---|---|---|----|---|---|---|---|----|
| ASV14<br>73 | GCAGCAGTGGGGGATATTGCACAATGGAGGA   |   |   |   |   |   |   |   |   |   |   |   |   |   |    |   |   |   |   |    |
|             | AACTCTGATGCAGCGACGCCGCGTGAGTGAA   |   |   |   |   |   |   |   |   |   |   |   |   |   |    |   |   |   |   |    |
|             | GAAGTATTTTCGGTATGTAAAGCTCTATCAGCA |   |   |   |   |   |   |   |   |   |   |   |   |   |    |   |   |   |   |    |
|             | GGGAAGAAAGACTCGAAAGAGAGATGACGGT   |   |   |   |   |   |   |   |   |   |   |   |   |   |    |   |   |   |   |    |
|             | ACCTGACTAAGAAGCTCCGGCTAAATACGTGC  |   |   |   |   |   |   |   |   |   |   |   |   |   |    |   |   |   |   |    |
|             | CAGCAGCCGCGTAATACGTATGGAGCAAGC    |   |   |   |   |   |   |   |   |   |   |   |   |   |    |   |   |   |   |    |
|             | GTTATCCGGATTTACTGGGTGTAAAGGGAGCG  | 0 | 0 | 0 | 0 | 0 | 0 | 0 | 0 | 0 | 0 | 0 | 0 | 6 | 69 | 0 | 0 | 0 | 3 | 0  |
|             | CAGACGGTTATGCAAGTCTGAAGTGAAAAAC   |   |   |   |   |   |   |   |   |   |   |   |   |   |    |   |   |   |   | 13 |
|             | CACGGCTCAACTGTGGTCTTGCTTTGGAACT   |   |   |   |   |   |   |   |   |   |   |   |   |   |    |   |   |   |   |    |
|             | GTGTAAGTACAGTGTTCGGAAGGGTAAGCGGA  |   |   |   |   |   |   |   |   |   |   |   |   |   |    |   |   |   |   |    |
|             | ATTCCTAGTGTAGCGGTGAAATGCGTAGATAT  |   |   |   |   |   |   |   |   |   |   |   |   |   |    |   |   |   |   |    |
|             | TAGGAAGAACACCGGAGGCGAAGGCGGCTTA   |   |   |   |   |   |   |   |   |   |   |   |   |   |    |   |   |   |   |    |
|             | CTGGACGATAACTGACGTTGAGGCTCGAAGGC  |   |   |   |   |   |   |   |   |   |   |   |   |   |    |   |   |   |   |    |
|             | GTGGGTAGCAAACAGGATTAGATAC         |   |   |   |   |   |   |   |   |   |   |   |   |   |    |   |   |   |   |    |
| ASV15<br>69 | GCTGCAGTAGGGAATCTTTCACAATGGGCGAA  |   |   |   |   |   |   |   |   |   |   |   |   |   |    |   |   |   |   |    |
|             | AGCCTGATGGAGCAACGCCGCGTGCAGGATG   |   |   |   |   |   |   |   |   |   |   |   |   |   |    |   |   |   |   |    |
|             | AAGGCCTTCGGGTGTAAACTGCTTTTATAAG   | 0 | 0 | 0 | 0 | 0 | 0 | 0 | 0 | 0 | 0 | 0 | 0 | 0 | 18 | 0 | 8 | 0 | 0 | 20 |
|             | CGAGAAATATGATGGTAACTTATGAATAAGG   |   |   |   |   |   |   |   |   |   |   |   |   |   |    |   |   |   |   | 37 |
|             | ATCGGCTAACTACGTGCCAGCAGCCGCGGTCA  |   |   |   |   |   |   |   |   |   |   |   |   |   |    |   |   |   |   |    |
|             | TACGTAGGATCCGAGCATTATCCGAGTGACT   |   |   |   |   |   |   |   |   |   |   |   |   |   |    |   |   |   |   |    |

GGGTGTAAAGAGTTGCGTAGGTGGCATAGTAA  
 GTAGATAGTGAAATCTGGTGGCTCAACCATTC  
 AGACTATTATCTAAACTGCTAAGCTCGAGACC  
 GTTAGGGGTAACTGGAATTTCTAGTGTAGGAG  
 TGAAATCCGTAGATATTAGAAGGAACACCGAT  
 AGCGTAGGCAGGTTACTGGGACGGTTCTGACA  
 CTAAGGCACGAAAGCGTAGGGAGCAAACGGG  
 ATTAGATAC

GCAGCAGTGGGGAATATTGGGCAATGGGAGG  
 AATCCTGACCCAGCGACGCCGCGTGAACGAA  
 GACGGCCTTCGGGTTGTAAAGTTCTTTTATGTG  
 GGAAGAAGGAAGTGACGGTACCACATGAATA  
 AGCCCCGGCTAACTACGTGCCAGCAGCCGCG  
 GTAATACGTAGGGGGCGAGCGTTGTCCGGAAT  
 TACTGGGCGTAAAGGGCACGCAGGCTGTGCTT  
 CAAGTCAGCTGTAAAAGGATGCGGCTTAACCG  
 TGTTATGCAGTTGAGACTGAGGTGCTGGAGTA  
 CCGGAGAGGCAAGTGGAATTCCCAGTGTAGC  
 GGTGAAATGCGTAGATATTGGAAGAACATC  
 GGTGGCGAAGGCGACTTGCTGGACGGTAACTG  
 ACGCTGAGGTGCGAAAGCCAGGGTAGCGAAC  
 GGGATTAGATAC

ASV16  
 00

0 0 0 0 0 0 0 0 0 0 0 0 0 4 5 39 0 0 0 25 0 0 0

\*p-value<0.05; \*p-value<0.1.

**Table S4.** Description of the sequencing run and processing

| Sample Code | Group   | Input reads | Quality-filtered reads | Denoised reads Forward | Denoised reads Reverse | Paired-end merged reads | Non-chimeric reads | Final reads |
|-------------|---------|-------------|------------------------|------------------------|------------------------|-------------------------|--------------------|-------------|
| 56          | Control | 79908       | 62444                  | 61829                  | 62032                  | 60519                   | 54601              | 54601       |
| 58          | Control | 102243      | 78502                  | 77419                  | 77831                  | 75389                   | 71334              | 71334       |
| 60          | Control | 99651       | 71118                  | 69912                  | 70317                  | 67779                   | 64016              | 64016       |
| 65          | Control | 124833      | 91466                  | 90088                  | 90755                  | 87173                   | 82955              | 82955       |
| 67          | Control | 115307      | 84464                  | 82861                  | 83501                  | 79513                   | 76139              | 76139       |
| 69          | Control | 92486       | 67008                  | 65412                  | 66120                  | 62136                   | 59336              | 59336       |
| 73          | Control | 105805      | 80748                  | 79740                  | 80065                  | 77069                   | 70409              | 70409       |
| 75          | Control | 108758      | 81360                  | 80240                  | 80733                  | 78720                   | 76665              | 76665       |
| 77          | Control | 91382       | 67852                  | 66682                  | 67191                  | 64834                   | 63685              | 63685       |
| 82          | Control | 97737       | 72821                  | 72294                  | 72476                  | 71252                   | 68432              | 68432       |
| 85          | Control | 89930       | 65055                  | 63228                  | 64049                  | 60371                   | 57376              | 57376       |
| 116         | UC      | 149803      | 116075                 | 114284                 | 114992                 | 110618                  | 101948             | 101948      |
| 118         | UC      | 141359      | 111029                 | 109818                 | 110277                 | 106798                  | 93466              | 93466       |
| 120         | UC      | 136138      | 96031                  | 94148                  | 94952                  | 90306                   | 82309              | 82309       |
| 122         | UC      | 109042      | 84824                  | 84002                  | 84063                  | 82794                   | 78065              | 78065       |
| 124         | UC      | 103869      | 75887                  | 75533                  | 75616                  | 74393                   | 70769              | 70769       |
| 126         | UC      | 118484      | 87416                  | 86804                  | 87006                  | 85449                   | 83263              | 83263       |
| 128         | UC      | 152860      | 115980                 | 113633                 | 114896                 | 109248                  | 99097              | 99097       |
| 130         | UC      | 136590      | 104676                 | 103532                 | 103926                 | 100432                  | 93799              | 93799       |
| 132         | UC      | 131378      | 93634                  | 92659                  | 93269                  | 91037                   | 80523              | 80523       |
| 134         | UC      | 116715      | 86682                  | 85498                  | 86083                  | 82568                   | 75494              | 75494       |

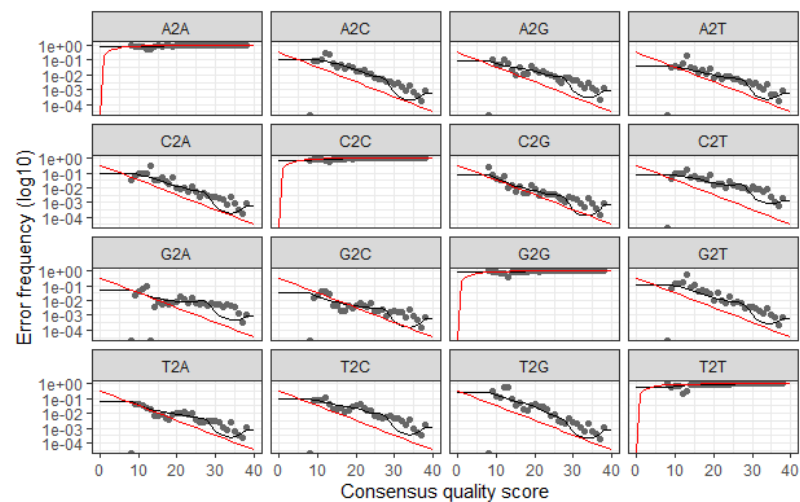

**Figure S1.** Plot showing error rates for each possible transition (A→C, A→G, ...) (Points are the observed error rates for each consensus quality score). The black line shows the estimated error rates after convergence of the machine-learning algorithm. The red line shows the error rates expected under the nominal definition of the Q-score. Here the estimated error rates (black line) are a good fit to the observed rates (points), and the error rates drop with increased quality as expected.

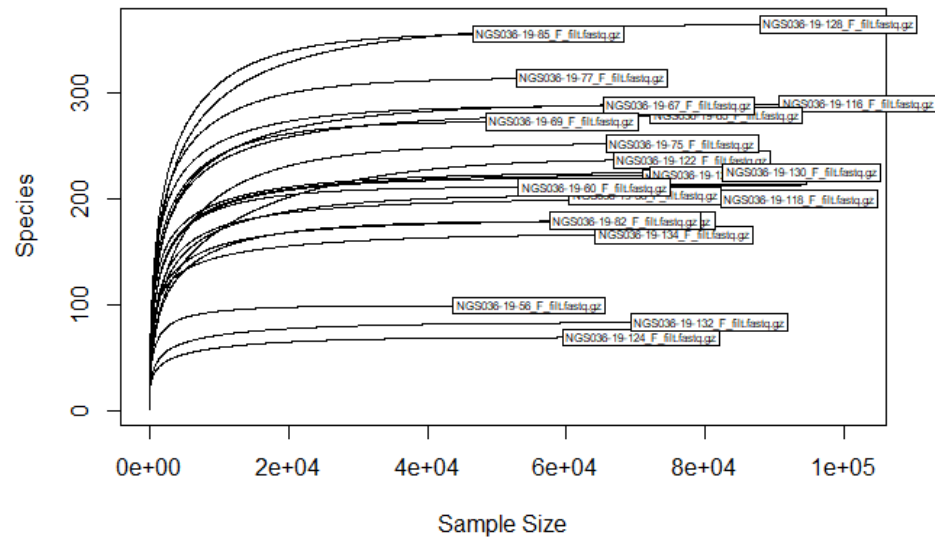

**Figure S2.** Rarefaction curves per sample that show the sequencing depth of the study.
